# Supplementary material for: Acyclic triaryl olefins possessing a sulfohydroxamic acid pharmacophore: synthesis, nitric oxide/nitroxyl release, cyclooxygenase inhibition, and anti-inflammatory studies
Source: Royal Society of Chemistry journal article supplement (doi:10.1039/c005066k), 2010-01-01
Supplement: c005066k.pdf [file c005066k.pdf]

## Supplementary Information (Manuscript C005066K)

- 1) Experimental procedures and spectroscopic data for compounds **6-12**, **16-19** and **21-29** described in the paper are given in the supporting information.
- 2)  $^1\text{H}$  NMR scans for all compounds **6-12**, **13a-g**, **16-19** and **21-29** are provided.

**Isopropyl 4-acetylbenzenesulfonate (6).** 4-Dimethylaminopyridine (2.30 g, 18.9 mmol) and dry  $\text{CH}_2\text{Cl}_2$  (50 mL) were added to 2-propanol (1.45 mL, 19.0 mmol), the mixture was cooled to 0–5°C, and a solution of 4-acetylbenzenesulfonyl chloride (**5**, 1.38 g, 6.3 mmol) in dry  $\text{CH}_2\text{Cl}_2$  (20 mL) was added drop wise with stirring. The reaction was allowed to proceed at 25°C for 4 hours with stirring, the mixture was washed with 1M aqueous HCl solution (2 x 80 mL) and then brine (100 mL), the organic layer was dried ( $\text{MgSO}_4$ ), and the solvent was removed in vacuo to give **6** (1.35 g, 88%) as a yellowish oil which was used without further purification. IR (film): 2986, 1698, 1368, 1184  $\text{cm}^{-1}$ ; ESI-MS: 243  $[\text{M}+\text{H}]^+$ ;  $^1\text{H}$  NMR ( $\text{CDCl}_3$ ):  $\delta$  1.31 (d,  $J$  = 6.1 Hz, 6H,  $\text{CH}(\text{CH}_3)_2$ ), 2.67 (s, 3H,  $\text{COCH}_3$ ), 4.83 (heptet,  $J$  = 6.1 Hz, 1H,  $\text{CH}(\text{CH}_3)_2$ ), 8.02 (dd,  $J$  = 6.7, 1.8 Hz, 2H, phenyl H-2, H-6), 8.11 (dd,  $J$  = 6.7, 1.8 Hz, 2H, phenyl H-3, H-5).

**1,1-Diphenyl-2-(4-isopropoxysulfonylphenyl)prop-1-ene (7).**  $\text{TiCl}_4$  (2.73 mL, 24.8 mmol) was added drop wise to a stirred suspension of Zn powder (3.24 g, 49.8 mmol) in dry THF (80 mL), under an argon atmosphere at -10°C, and the reaction mixture was refluxed for 2 hours. A solution of isopropyl 4-acetylbenzenesulfonate (**6**, 1.5 g, 6.2 mmol) and benzophenone (1.13 g, 6.2 mmol) in dry THF (20 mL) were added to a cooled suspension of the titanium reagent at 0°C, and the reaction was allowed to proceed at reflux for 30 minutes. After cooling to 25°C, the reaction mixture was poured into a 10% aqueous  $\text{K}_2\text{CO}_3$  solution (100 mL), this mixture was stirred vigorously for 5 minutes, and the dispersed insoluble material was removed by vacuum filtration through a pad of Celite 545. The organic layer was separated and the aqueous layer was extracted with EtOAc (2 x 80 mL). The combined organic fractions were washed with water and then brine, and the organic fraction was dried ( $\text{MgSO}_4$ ). Removal of the solvent in vacuo gave a residue that was purified by silica gel column chromatography using EtOAc:hexane (1:20, v/v) as eluant to afford **7** (650 mg, 27.1%) as a white solid, mp 91–94°C. IR (film): 2990, 2919, 1364, 1185  $\text{cm}^{-1}$ ; ESI-MS: 393  $[\text{M}+\text{H}]^+$ , 410  $[\text{M}+\text{NH}_4]^+$ ;  $^1\text{H}$  NMR ( $\text{CDCl}_3$ ):  $\delta$  1.23 (d,  $J$  = 6.1 Hz, 6H,  $\text{CH}(\text{CH}_3)_2$ ), 2.17 (s, 3H,  $\text{CH}_3\text{C}=\text{C}$ ), 4.68 (heptet,  $J$  = 6.1 Hz, 1H,  $\text{CH}(\text{CH}_3)_2$ ), 6.84–6.88 (m, 2H,

phenyl hydrogens), 7.00-7.10 (m, 3H, phenyl hydrogens), 7.23-7.40 (m, 7H, phenyl hydrogens, sulfonylphenyl H-2, H-6), 7.69 (dd,  $J = 6.7, 1.8$  Hz, 2H, sulfonylphenyl H-3, H-5).

**1,1-Di-(4-methylphenyl)-2-(4-isopropoxysulfonylphenyl)prop-1-ene (8).** Compound **8** was prepared using a methodology similar to that described above for the synthesis of compound **7** except that 4,4'-dimethylbenzophenone was used in place of benzophenone; 33.6% yield, white solid, mp 150-153°C; IR (film): 2928, 2923, 1360, 1193  $\text{cm}^{-1}$ ; ESI-MS: 443  $[\text{M}+\text{Na}]^+$ ;  $^1\text{H}$  NMR ( $\text{CDCl}_3$ ):  $\delta$  1.24 (d,  $J = 6.1$  Hz, 6H,  $\text{CH}(\text{CH}_3)_2$ ), 2.17 (s, 3H,  $\text{ArCH}_3$ ), 2.21 (s, 3H,  $\text{ArCH}_3$ ), 2.38 (s, 3H,  $\text{CH}_3\text{C}=\text{C}$ ), 4.69 (heptet,  $J = 6.1$  Hz, 1H,  $\text{CH}(\text{CH}_3)_2$ ), 6.72 and 6.82 (two d,  $J = 7.9$  Hz, 2H each, tolyl H-3, H-5), 7.11-7.31 (m, 6H, two tolyl H-2, H-6 and sulfonylphenyl H-2, H-6), 7.69 (dd,  $J = 6.7, 1.8$  Hz, 2H, sulfonylphenyl H-3, H-5).

**1,1-Diphenyl-2-(4-oxysulfonylphenyl)prop-1-ene sodium salt (9).** 1,1-Diphenyl-2-(4-isopropoxysulfonylphenyl)prop-1-ene (**7**, 0.478 g, 1.14 mmol) was dissolved in acetone (15 mL), NaI (0.256 g, 1.17 mmol) was added, and the reaction mixture was stirred at reflux for 16 hours. Removal of the solvent *in vacuo* gave a solid which was washed with acetone (2 mL) and then EtOAc (2 mL) to provide **9** (92%) as a white solid, mp 265-270°C; IR (KBr): 3058, 3017, 1206, 1134  $\text{cm}^{-1}$ ; ESI-MS: 349  $[\text{M}-\text{Na}]^-$ ;  $^1\text{H}$  NMR ( $\text{DMSO}-d_6$ ):  $\delta$  2.03 (s, 3H,  $\text{CH}_3\text{C}=\text{C}$ ), 6.87-6.89 (m, 2H, phenyl hydrogens), 7.01-7.30 (m, 10H, phenyl hydrogens and sulfonylphenyl H-2, H-6), 7.36 (d,  $J = 7.9$  Hz, 2H, sulfonylphenyl H-3, H-5).

**1,1-Di-(4-methylphenyl)-2-(4-oxysulfonylphenyl)prop-1-ene sodium salt (10).** Reaction of **8** with NaI, using a methodology similar to that used to prepare **9**, furnished **10** (88%) as a white solid; mp > 300 °C; IR (KBr): 3037, 2919, 1191, 1129  $\text{cm}^{-1}$ ; ESI-MS: 377  $[\text{M}-\text{Na}]^-$ ;  $^1\text{H}$  NMR ( $\text{DMSO}-d_6$ ):  $\delta$  2.03 (s, 3H,  $\text{CH}_3\text{C}=\text{C}$ ), 2.15 (s, 3H,  $\text{ArCH}_3$ ), 2.31 (s, 3H,  $\text{ArCH}_3$ ), 6.73 and 6.88 (two d,  $J = 7.9$  Hz, 2H each, tolyl H-3, H-5), 7.06 and 7.09 (two overlapping d,  $J = 7.9$  Hz, 4H total, tolyl H-2, H-6), 7.17 (d,  $J = 7.9$  Hz, 2H, sulfonylphenyl H-2, H-6), 7.36 (d,  $J = 7.9$  Hz, 2H, sulfonylphenyl H-3, H-5).

**1,1-Diphenyl-2-(4-chlorosulfonylphenyl)prop-1-ene (11).** 1,1-Diphenyl-2-(4-oxysulfonylphenyl)prop-1-ene sodium salt (**9**, 0.290 g, 7.25 mmol) was dissolved in DMF (10 mL) and  $\text{SOCl}_2$  (0.173 g, 1.45 mmol) was added. The reaction mixture was stirred at 25°C for 1 hour, poured into cold water (80 mL), and extracted with EtOAc (3 x 80 mL). The combined organic fractions were washed with aqueous HCl solution and then brine prior to drying the organic fraction ( $\text{Na}_2\text{SO}_4$ ). Removal of the solvent *in vacuo* gave **11** as a brown syrup (85.2%)

that was used without further purification. IR (film): 1378, 1189  $\text{cm}^{-1}$ ; ESI-MS: 369  $[\text{M}+\text{H}]^+$ ;  $^1\text{H}$  NMR ( $\text{CDCl}_3$ ):  $\delta$  2.19 (s, 3H,  $\text{CH}_3\text{C}=\text{C}$ ), 6.86-6.89 (m, 2H, phenyl hydrogens), 7.07-7.09 (m, 3H, phenyl hydrogens), 7.24-7.41 (m, 7H, phenyl hydrogens and sulfonylphenyl H-2, H-6), 7.82 (d,  $J = 7.9$  Hz, 2H, sulfonylphenyl H-3, H-5).

**1,1-Di-(4-methylphenyl)-2-(4-chlorosulfonylphenyl)prop-1-ene (12).** Compound **12** was synthesized, using a methodology similar to that used to prepare **11**, as a brown syrup (79%); IR (film): 2969, 2919, 2849, 1382, 1176  $\text{cm}^{-1}$ ; ESI-MS: 397  $[\text{M}+\text{H}]^+$ ;  $^1\text{H}$  NMR ( $\text{CDCl}_3$ ):  $\delta$  2.17 (s, 3H,  $\text{CH}_3\text{C}=\text{C}$ ), 2.23 (s, 3H,  $\text{ArCH}_3$ ), 2.38 (s, 3H,  $\text{ArCH}_3$ ), 6.73 and 6.86 (two d,  $J = 8.6$  and  $7.9$  Hz, respectively, 2H each, tolyl H-3, H-5), 7.10-7.19 (m, 4H, two tolyl H-2, H-6), 7.34-7.38 (m, 2H, sulfonylphenyl H-2, H-6), 7.81 (dd,  $J = 6.7, 1.8$  Hz, 2H, sulfonylphenyl H-3, H-5).

**1,1-Di-(4-fluorophenyl)-2-phenylprop-1-ene (16).** The McMurry reaction of acetophenone (**14**) and 4,4'-difluorobenophenone, using a procedure similar to that used to prepare **7**, afforded the title compound **16** as a white syrup (71.3%). IR (film): 1604, 1508, 1220, 1154  $\text{cm}^{-1}$ ; ESI-MS: 307  $[\text{M}+\text{H}]^+$ ;  $^1\text{H}$  NMR ( $\text{CDCl}_3$ ):  $\delta$  2.14 (s, 3H,  $\text{CH}_3\text{C}=\text{C}$ ), 6.70-6.76 and 6.8-6.86 (two m, 2H each, 4-fluorophenyl H-3, H-5), 6.94-7.23 (m, 9H, two 4-fluorophenyl H-2, H-6 and five phenyl hydrogens).

**1,1-Di-(4-fluorophenyl)-2-phenylhex-1-ene (17).** The McMurry cross-coupling reaction of valerophenone (**15**) and 4,4'-difluorobenzophenone, using a procedure similar to that used for the synthesis of **7**, furnished the title compound **17** as a white solid (83%); mp 73-75°C; IR (film): 1512, 1224, 1159  $\text{cm}^{-1}$ ; ESI-MS: 349  $[\text{M}+\text{H}]^+$ ;  $^1\text{H}$  NMR ( $\text{CDCl}_3$ ):  $\delta$  0.79 (t,  $J = 7.3$  Hz, 3H,  $\text{CH}_2\text{CH}_2\text{CH}_2\text{CH}_3$ ), 1.20-1.29 (m, 4H,  $\text{CH}_2\text{CH}_2\text{CH}_2\text{CH}_3$ ), 2.41 (t,  $J = 7.3$  Hz, 2H,  $\text{CH}_2\text{C}=\text{C}$ ), 6.67-6.73, 6.79-6.86 (two m, 2H each, 4-fluorophenyl H-3, H-5), 6.94-7.27 (m, 9H, two 4-fluorophenyl H-2, H-6 and five phenyl hydrogens).

**1,1-Di-(4-fluorophenyl)-2-(4-chlorosulfonylphenyl)prop-1-ene (18).** Chlorosulfonic acid (1.10 mL, 16.3 mmol) was added slowly to a solution of the olefin **16** (1.0 g, 3.27 mmol) in  $\text{CHCl}_3$  (55 mL). The reaction was allowed to proceed with stirring at 25°C for 2 hours, the reaction mixture was washed with aqueous HCl solution and then brine, and the organic fraction was dried ( $\text{Na}_2\text{SO}_4$ ). Removal of the solvent *in vacuo* gave the product **18** as a brown syrup (34.2%) that was used in subsequent reactions without further purification. IR (film): 1506, 1380, 1224, 1158  $\text{cm}^{-1}$ ; ESI-MS: 405  $[\text{M}+\text{H}]^+$ ;  $^1\text{H}$  NMR ( $\text{CDCl}_3$ ):  $\delta$  2.18 (s, 3H,  $\text{CH}_3\text{C}=\text{C}$ ), 6.78-6.86, 6.94-6.99 (two m, 2H each, 4-fluorophenyl H-3, H-5), 7.05-7.37 (m, 6H, two 4-

fluorophenyl H-2, H-6 and sulfonylphenyl H-2, H-6), 7.86 (d,  $J = 7.9$  Hz, 2H, sulfonylphenyl H-3, H-5).

**1,1-Di-(4-fluorophenyl)-2-(4-chlorosulfonylphenyl)hex-1-ene (19).** Chlorosulfonation of **17**, using a procedure similar to that described for the synthesis of **18**, afforded **19** (43.1%) as a brown syrup; IR (film): 2958, 2927, 2872, 1509, 1388, 1166  $\text{cm}^{-1}$ ; ESI-MS: 447  $[\text{M}+\text{H}]^+$ ;  $^1\text{H}$  NMR ( $\text{CDCl}_3$ ):  $\delta$  0.81 (t,  $J = 6.7$  Hz, 3H,  $\text{CH}_2\text{CH}_2\text{CH}_2\text{CH}_3$ ), 1.22-1.27 (m, 4H,  $\text{CH}_2\text{CH}_2\text{CH}_2\text{CH}_3$ ), 2.47 (t,  $J = 6.7$  Hz, 2H,  $\text{CH}_2\text{C}=\text{C}$ ), 6.72-6.85, 6.93-6.98 (two m, 2H each, 4-fluorophenyl H-3, H-5), 7.05-7.34 (m, 6H, two 4-fluorophenyl H-2, H-6 and sulfonylphenyl H-2, H-6), 7.85 (dd,  $J = 6.7, 1.8$  Hz, 2H, sulfonylphenyl H-3, H-5).

**4-Amylbenzenesulfonyl chloride (21).** Chlorosulfonic acid (5.41 mL, 81 mmol) was added slowly to a solution of amylbenzene (**20**, 4g, 27 mmol) in  $\text{CHCl}_3$  (27 mL). The reaction mixture was stirred at  $25^\circ\text{C}$  for 3 hours, slowly poured into ice-water (100 mL), and the mixture was extracted with EtOAc (3 x 100 mL). The combined organic extracts were washed with brine and the organic fraction was dried ( $\text{Na}_2\text{SO}_4$ ). Removal of the solvent *in vacuo* gave a colorless oil which solidified upon standing in a refrigerator to provide the title compound **21** as a white solid (92.1%), mp  $39\text{--}40^\circ\text{C}$  (lit. mp  $44\text{--}46^\circ\text{C}$ ; M. E. Neubert, S. J. Laskos, R. F. Griffith, M. E. Stahl and L. J. Maurer, *Molecular Crystals and Liquid Crystals*, 1979, **54**, 221); IR (film): 2963, 2927, 2860, 1380, 1174  $\text{cm}^{-1}$ ; ESI-MS: 247  $[\text{M}+\text{H}]^+$ ;  $^1\text{H}$  NMR ( $\text{CDCl}_3$ ):  $\delta$  0.91 (t,  $J = 6.7$  Hz, 3H,  $\text{CH}_2\text{CH}_2\text{CH}_2\text{CH}_2\text{CH}_3$ ), 1.31-1.36 (m, 4H,  $\text{CH}_2\text{CH}_2\text{CH}_2\text{CH}_2\text{CH}_3$ ), 1.64-1.69 (m, 2H,  $\text{CH}_2\text{CH}_2\text{CH}_2\text{CH}_2\text{CH}_3$ ), 2.73 (t,  $J = 7.9$  Hz, 2H,  $\text{CH}_2\text{C}=\text{C}$ ), 7.42 (d,  $J = 7.9$  Hz, 2H, H-3, H-5), 7.93 (d,  $J = 7.9$  Hz, 2H, H-2, H-6).

**Isopropyl 4-amylbenzenesulfonate (22).** Compound **22**, prepared using a procedure similar to that described for the synthesis of **6**, was obtained as a yellowish oil (89.1%), IR (film): 2989, 2932, 2855, 1365, 1190  $\text{cm}^{-1}$ ; ESI-MS: 271  $[\text{M}+\text{H}]^+$ , 288  $[\text{M}+\text{NH}_4]^+$ , 293  $[\text{M}+\text{Na}]^+$ ;  $^1\text{H}$  NMR ( $\text{CDCl}_3$ ):  $\delta$  0.90 (t,  $J = 7.3$  Hz, 3H,  $\text{CH}_2\text{CH}_2\text{CH}_2\text{CH}_2\text{CH}_3$ ), 1.28 (d,  $J = 6.1$  Hz, 6H,  $\text{CH}(\text{CH}_3)_2$ ), 1.31-1.36 (m, 4H,  $\text{CH}_2\text{CH}_2\text{CH}_2\text{CH}_2\text{CH}_3$ ), 1.59-1.66 (m, 2H,  $\text{CH}_2\text{CH}_2\text{CH}_2\text{CH}_2\text{CH}_3$ ), 2.69 (t,  $J = 7.3$  Hz, 2H,  $\text{CH}_2\text{C}=\text{C}$ ), 4.75 (heptet,  $J = 6.1$  Hz, 1H,  $\text{CH}(\text{CH}_3)_2$ ), 7.34 (d,  $J = 7.9$  Hz, 2H, H-3, H-5), 7.81 (dd,  $J = 7.9, 1.8$  Hz, 2H, H-2, H-6).

**Isopropyl 4-pentanoylbenzenesulfonate (23).** A solution of isopropyl 4-amylbenzenesulfonate (**22**, 6.6 g, 24.4 mmol) in acetone (250 mL) was cooled to  $-78^\circ\text{C}$  using a dry ice/acetone bath.  $\text{KMnO}_4$  (38 g, 0.244 mol) and  $\text{FeCl}_3$  (9.9 g, 61 mmol) were added, this

mixture was stirred for 2h at  $-78^{\circ}\text{C}$ , the reaction flask was removed from the cooling bath, the reaction mixture was allowed to warm gradually ( $\sim 1$  hour) to  $25^{\circ}\text{C}$ , and stirring was continued for an additional 1 hour at  $25^{\circ}\text{C}$ . The resulting suspension was filtered, the residue was washed with EtOAc (3 x 30 mL). The combined filtrate and washings were dried ( $\text{Na}_2\text{SO}_4$ ), and the solvent was removed to give a residue that was purified by flash silica gel column chromatography using *n*-hexane:EtOAc (3:1, v/v) as eluent to afford the title compound **23** (2.9 g, 41.8%) as a yellowish oil. IR (film): 2962, 2874, 1707, 1361, 1186  $\text{cm}^{-1}$ ; ESI-MS: 285  $[\text{M}+\text{H}]^+$ ;  $^1\text{H}$  NMR ( $\text{CDCl}_3$ ):  $\delta$  0.97 (t,  $J = 7.3$  Hz, 3H,  $\text{CH}_2\text{CH}_2\text{CH}_2\text{CH}_3$ ), 1.31 (d,  $J = 6.1$  Hz, 6H,  $\text{CH}(\text{CH}_3)_2$ ), 1.37-1.46 (m, 2H,  $\text{CH}_2\text{CH}_2\text{CH}_2\text{CH}_3$ ), 1.69-1.79 (m, 2H,  $\text{CH}_2\text{CH}_2\text{CH}_2\text{CH}_3$ ), 3.01 (t,  $J = 6.7$  Hz, 2H,  $\text{CH}_2\text{C}=\text{C}$ ), 4.82 (heptet,  $J = 6.1$  Hz, 1H,  $\text{CH}(\text{CH}_3)_2$ ), 8.02 (d,  $J = 7.9$  Hz, 2H, H-2, H-6), 8.10 (dd,  $J = 7.9, 1.8$  Hz, 2H, H-3, H-5).

**1,1-Diphenyl-2-(4-isopropoxysulfonylphenyl)hex-1-ene (24).** The title compound, prepared using a McMurry cross-coupling reaction of **23** with benzophenone, was obtained as a white solid (32.1%), mp  $68-70^{\circ}\text{C}$ ; IR (film): 2960, 2929, 2857, 1368, 1192  $\text{cm}^{-1}$ ; ESI-MS: 435  $[\text{M}+\text{H}]^+$ ;  $^1\text{H}$  NMR ( $\text{CDCl}_3$ ):  $\delta$  0.78 (t,  $J = 6.7$  Hz, 3H,  $\text{CH}_2\text{CH}_2\text{CH}_2\text{CH}_3$ ), 1.21 (d,  $J = 6.1$  Hz, 6H,  $\text{CH}(\text{CH}_3)_2$ ), 1.24-1.27 (m, 4H,  $\text{CH}_2\text{CH}_2\text{CH}_2\text{CH}_3$ ), 2.47 (t,  $J = 6.7$  Hz, 2H,  $\text{CH}_2\text{C}=\text{C}$ ), 4.67 (heptet,  $J = 6.1$  Hz, 1H,  $\text{CH}(\text{CH}_3)_2$ ), 6.83-6.86 (m, 2H, phenyl hydrogens), 6.98-7.01 (m, 3H, phenyl hydrogens), 7.22-7.39 (m, 7H, phenyl hydrogens and sulfonylphenyl H-2, H-6), 7.70 (dd,  $J = 6.7, 1.8$  Hz, 2H, sulfonylphenyl H-3, H-5).

**1,1-Di(4-methylphenyl)-2-(4-isopropoxysulfonylphenyl)hex-1-ene (25).** The title compound, prepared using a McMurry cross-coupling reaction of **23** with 4,4'-dimethylbenzophenone, was obtained (28.7%), mp  $69-71^{\circ}\text{C}$ ; IR (film): 2962, 2926, 2869, 1372, 1186  $\text{cm}^{-1}$ ; ESI-MS: 463  $[\text{M}+\text{H}]^+$ , 480  $[\text{M}+\text{NH}_4]^+$ , 485  $[\text{M}+\text{Na}]^+$ ;  $^1\text{H}$  NMR ( $\text{CDCl}_3$ ):  $\delta$  0.78 (t,  $J = 7.3$  Hz, 3H,  $\text{CH}_2\text{CH}_2\text{CH}_2\text{CH}_3$ ), 1.21 (d,  $J = 6.7$  Hz, 6H,  $\text{CH}(\text{CH}_3)_2$ ), 1.24-1.33 (m, 4H,  $\text{CH}_2\text{CH}_2\text{CH}_2\text{CH}_3$ ), 2.18 (s, 3H,  $\text{ArCH}_3$ ), 2.37 (s, 3H,  $\text{ArCH}_3$ ), 2.47 (t,  $J = 7.3$  Hz, 2H,  $\text{CH}_2\text{C}=\text{C}$ ), 4.67 (heptet,  $J = 6.7$  Hz, 1H,  $\text{CH}(\text{CH}_3)_2$ ), 6.71, 6.79 (two d,  $J = 7.9$  Hz, 2H each, tolyl H-3, H-5), 7.09-7.18 (m, 4H, two tolyl H-2, H-6), 7.25-7.28 (m, 2H, sulfonylphenyl H-2, H-6), 7.69 (dd,  $J = 7.9, 1.8$  Hz, 2H, sulfonylphenyl H-3, H-5).

**1,1-Diphenyl-2-(4-oxysulfonylphenyl)hex-1-ene sodium salt (26).** Cleavage of the isopropyl sulfonate **24** with NaI, using the method described for the synthesis of **9**, afforded the title compound as a white solid (89.2%); mp  $> 300^{\circ}\text{C}$ ; IR (KBr): 2970, 2929, 2856, 1206, 1134

$\text{cm}^{-1}$ ; ESI-MS: 437  $[\text{M}+\text{Na}]^+$ ;  $^1\text{H}$  NMR ( $\text{DMSO-d}_6$ ):  $\delta$  0.71 (t,  $J = 6.7$  Hz, 3H,  $\text{CH}_2\text{CH}_2\text{CH}_2\text{CH}_3$ ), 1.13-1.23 (m, 4H,  $\text{CH}_2\text{CH}_2\text{CH}_2\text{CH}_3$ ), 2.35 (t,  $J = 6.7$  Hz, 2H,  $\text{CH}_2\text{C}=\text{C}$ ), 6.87-6.91 (m, 2H, phenyl hydrogens), 6.99-7.09 (m, 5H, phenyl hydrogens), 7.21-7.30 (m, 5H, phenyl hydrogens and sulfonylphenyl H-2, H-6), 7.37 (d,  $J = 7.9$  Hz, 2H, sulfonylphenyl H-3, H-5).

**1,1-Di-(4-methylphenyl)-2-(4-oxysulfonylphenyl)hex-1-ene sodium salt (27).** Cleavage of the isopropyl sulfonate **25** with NaI, using the method described for the synthesis of **9**, afforded the title compound **27** (86.8%) as a white solid, mp  $> 300$  °C; IR (KBr): 2960, 2919, 2856, 1201, 1132  $\text{cm}^{-1}$ ; ESI-MS: 419  $[\text{M}-\text{Na}]^-$ ;  $^1\text{H}$  NMR ( $\text{DMSO-d}_6$ ):  $\delta$  0.72 (t,  $J = 6.7$  Hz, 3H,  $\text{CH}_2\text{CH}_2\text{CH}_2\text{CH}_3$ ), 1.13-1.19 (m, 4H,  $\text{CH}_2\text{CH}_2\text{CH}_2\text{CH}_3$ ), 2.13 (s, 3H,  $\text{ArCH}_3$ ), 2.30 (s, 3H,  $\text{ArCH}_3$ ), 2.32-2.35 (m, 2H,  $\text{CH}_2\text{C}=\text{C}$ ), 6.72 and 6.85 (two d,  $J = 7.9$  Hz, 2H each, tolyl H-3, H-5), 7.03-7.08 (m, 4H, two tolyl H-2, H-6), 7.17 (d,  $J = 7.9$  Hz, 2H, sulfonylphenyl H-2, H-6), 7.37 (d,  $J = 7.9$  Hz, 2H, sulfonylphenyl H-3, H-5).

**1,1-Diphenyl-2-(4-chlorosulfonylphenyl)hex-1-ene (28).** Reaction of **26** with  $\text{SOCl}_2$ , using the method described for the synthesis of **11**, furnished the title compound **28** as a brown syrup (88.9%); IR (film): 2962, 2926, 2858, 1382, 1175  $\text{cm}^{-1}$ ; ESI-MS: 411  $[\text{M}+\text{H}]^+$ ;  $^1\text{H}$  NMR ( $\text{CDCl}_3$ ):  $\delta$  0.81 (t,  $J = 6.7$  Hz, 3H,  $\text{CH}_2\text{CH}_2\text{CH}_2\text{CH}_3$ ), 1.23-1.33 (m, 4H,  $\text{CH}_2\text{CH}_2\text{CH}_2\text{CH}_3$ ), 2.50 (t,  $J = 6.7$  Hz, 2H,  $\text{CH}_2\text{C}=\text{C}$ ), 6.84-6.87 (m, 2H, phenyl hydrogens), 7.05-7.07 (m, 3H, phenyl hydrogens), 7.24-7.41 (m, 7H, phenyl hydrogens and sulfonylphenyl H-2, H-6), 7.82 (dd,  $J = 7.9, 1.8$  Hz, 2H, sulfonylphenyl H-3, H-5).

**1,1-Di(4-methylphenyl)-2-(4-chlorosulfonylphenyl)hex-1-ene (29).** Reaction of **27** with  $\text{SOCl}_2$ , using the method described for the synthesis of **11**, provided the title compound **29** (85.5%) as a brown solid, mp 149-150°C; IR (film): 2956, 2915, 2858, 1383, 1178  $\text{cm}^{-1}$ ; ESI-MS: 439  $[\text{M}+\text{H}]^+$ ;  $^1\text{H}$  NMR ( $\text{CDCl}_3$ ):  $\delta$  0.81 (t,  $J = 7.3$  Hz, 3H,  $\text{CH}_2\text{CH}_2\text{CH}_2\text{CH}_3$ ), 1.25-1.29 (m, 4H,  $\text{CH}_2\text{CH}_2\text{CH}_2\text{CH}_3$ ), 2.22 (s, 3H,  $\text{ArCH}_3$ ), 2.38 (s, 3H,  $\text{ArCH}_3$ ), 2.50 (t,  $J = 7.9$  Hz, 2H,  $\text{CH}_2\text{C}=\text{C}$ ), 6.72, 6.85 (two d,  $J = 7.9$  Hz, 2H each, tolyl H-3, H-5), 7.10-7.17 (m, 4H, two tolyl H-2, H-6), 7.34 (d,  $J = 8.5$  Hz, 2H, sulfonylphenyl H-2, H-6), 7.82 (dd,  $J = 7.9, 1.8$  Hz, 2H, sulfonylphenyl H-3, H-5).

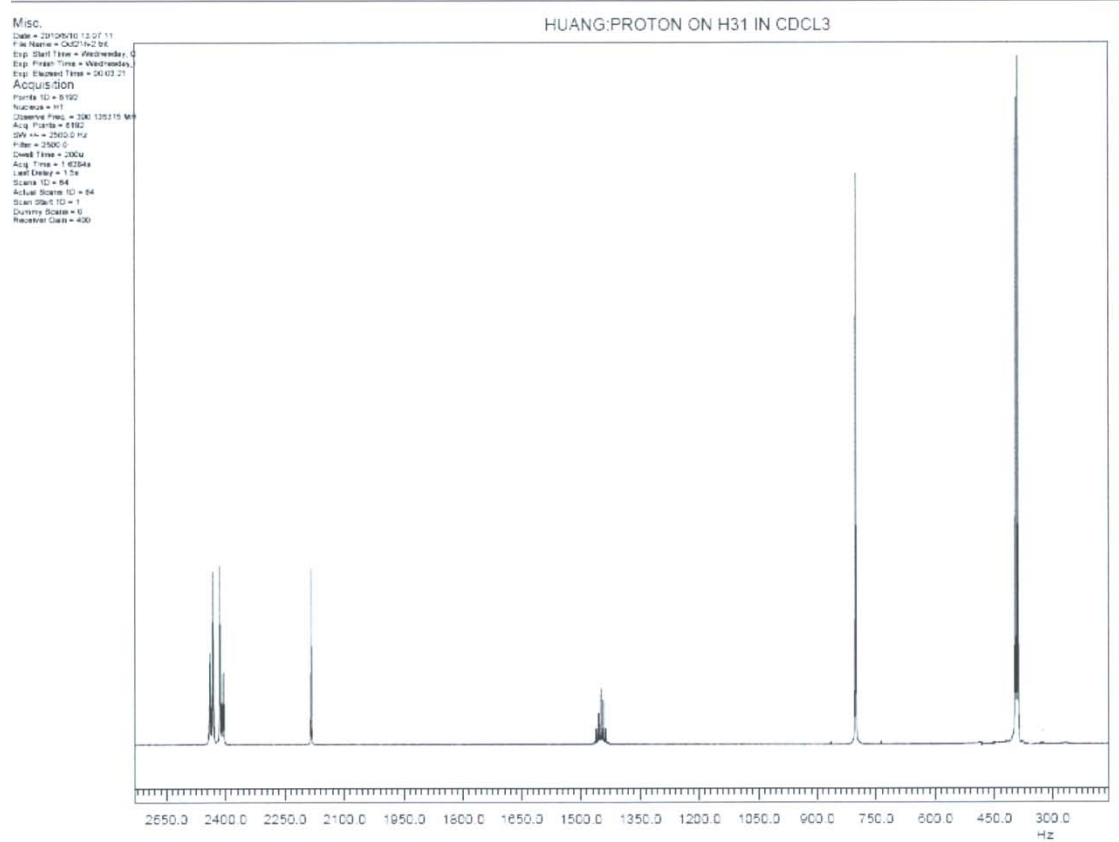

Compound 6

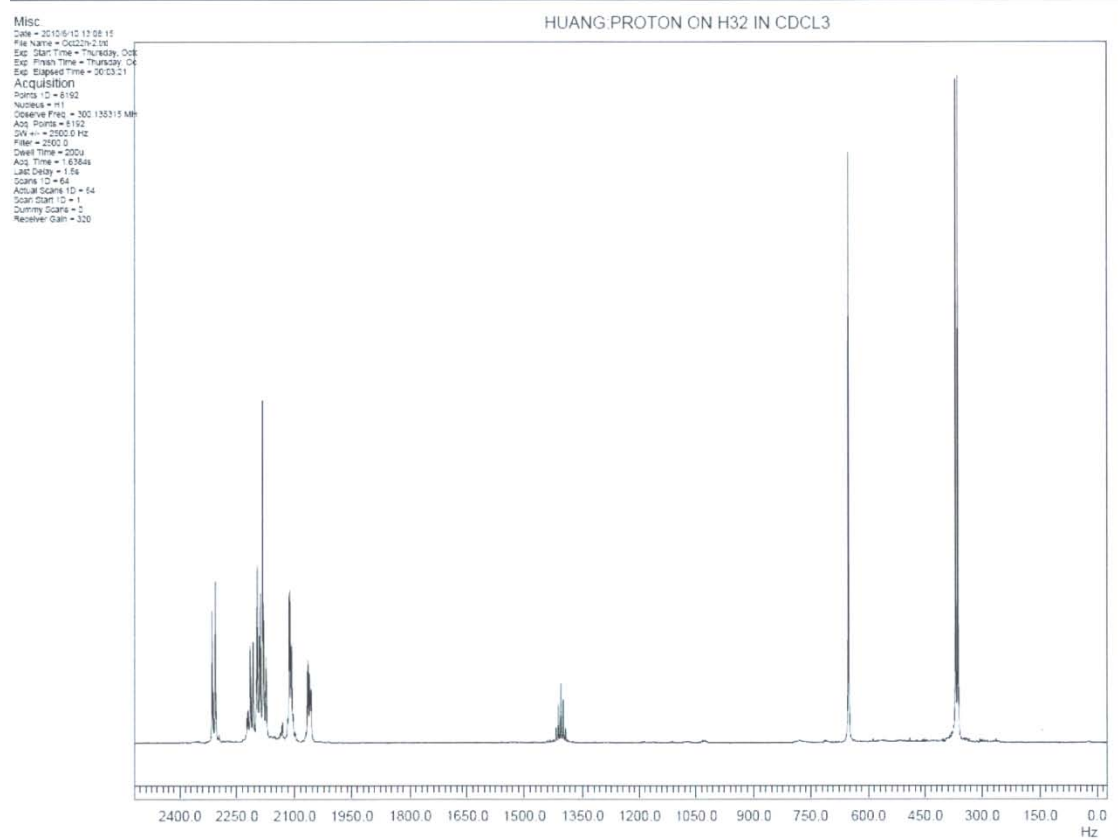

Compound 7



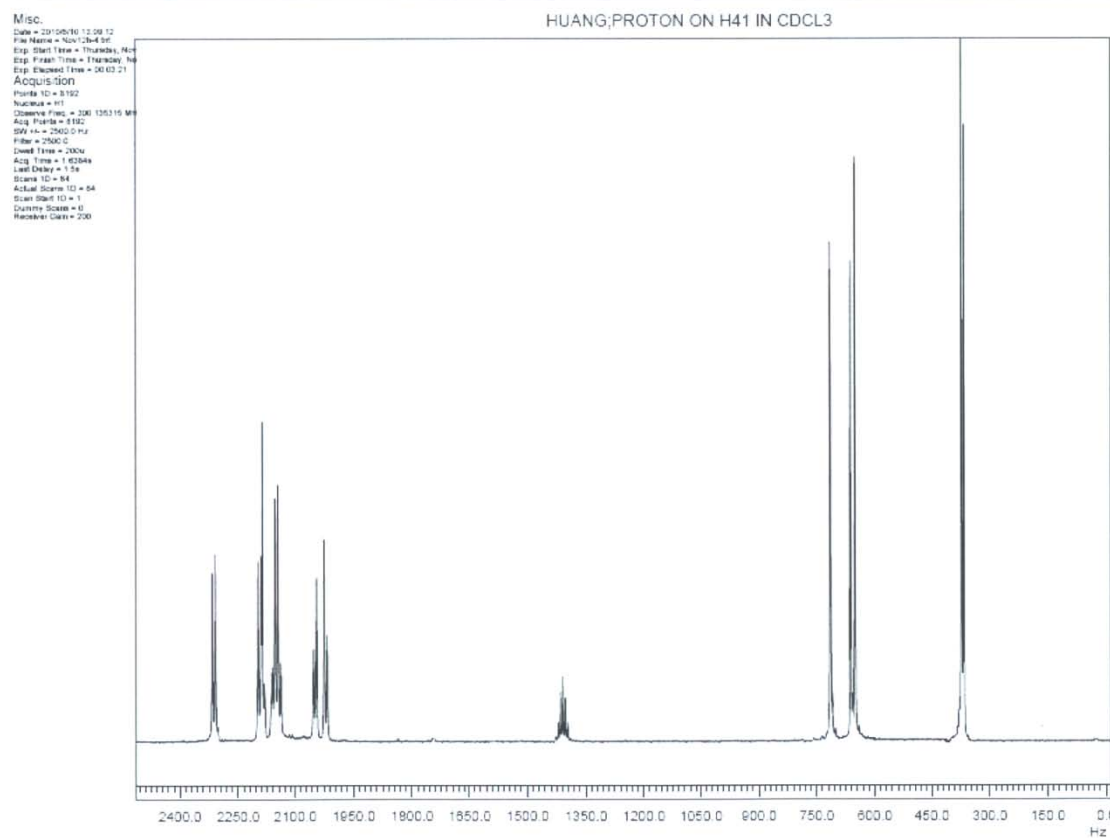

Compound 8

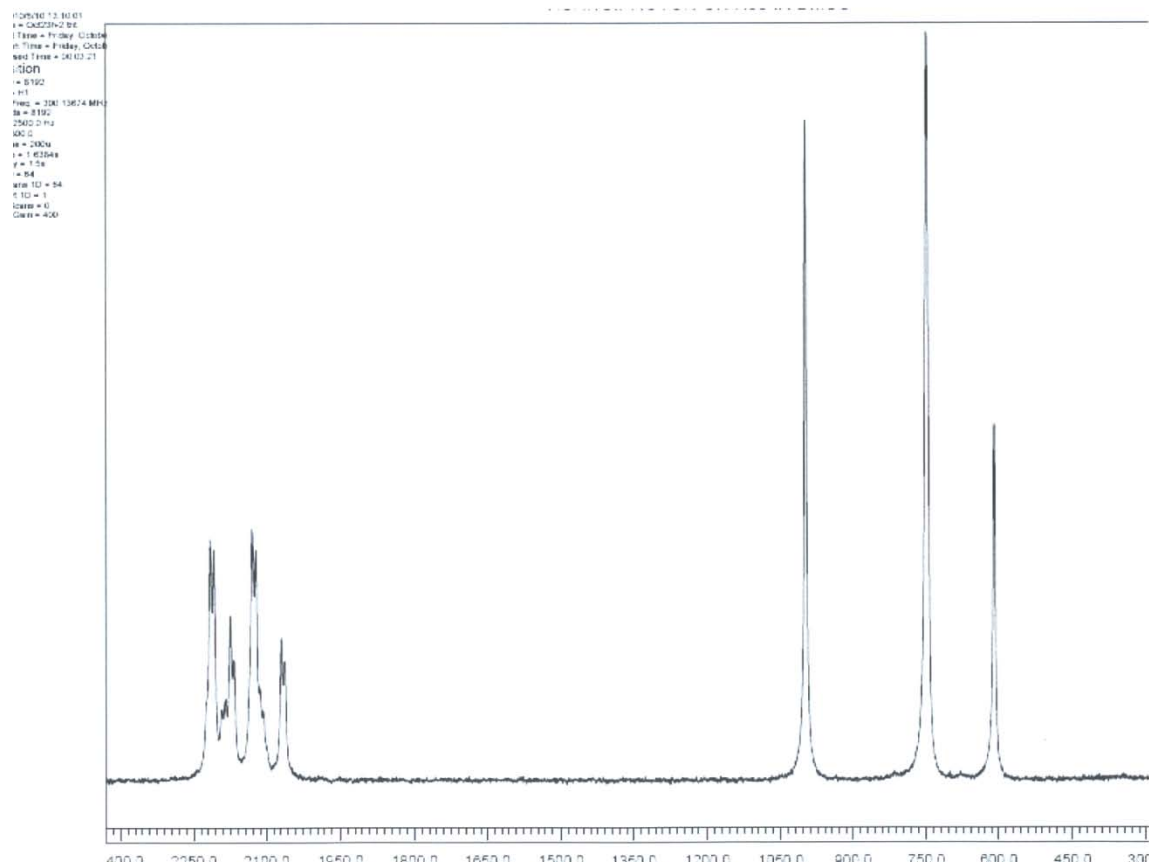

Compound 9

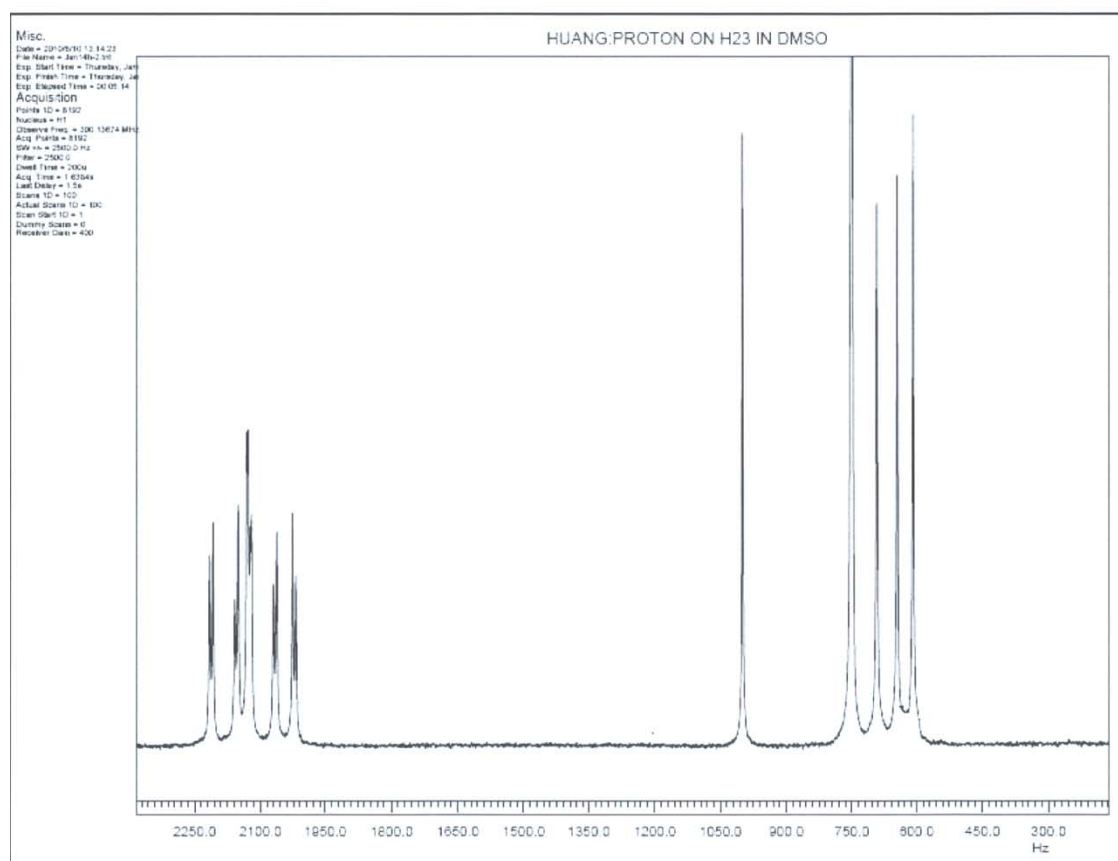

Compound 10

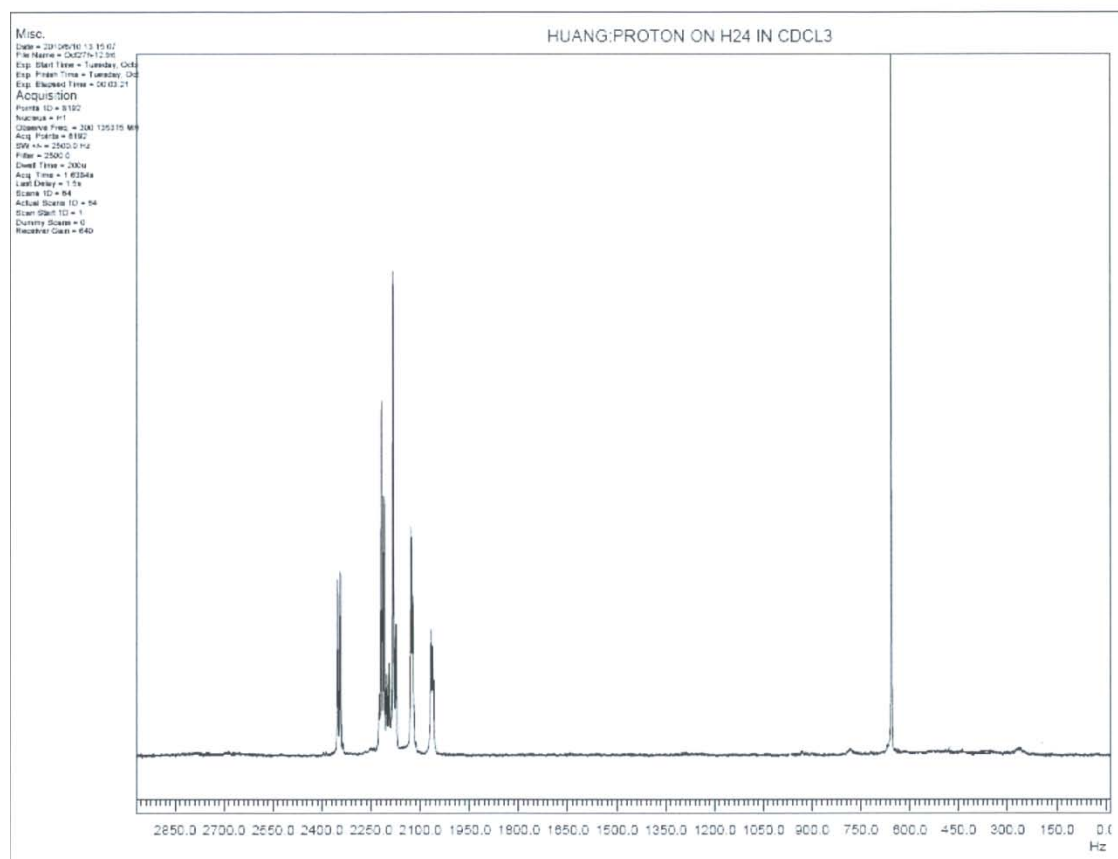

Compound 11

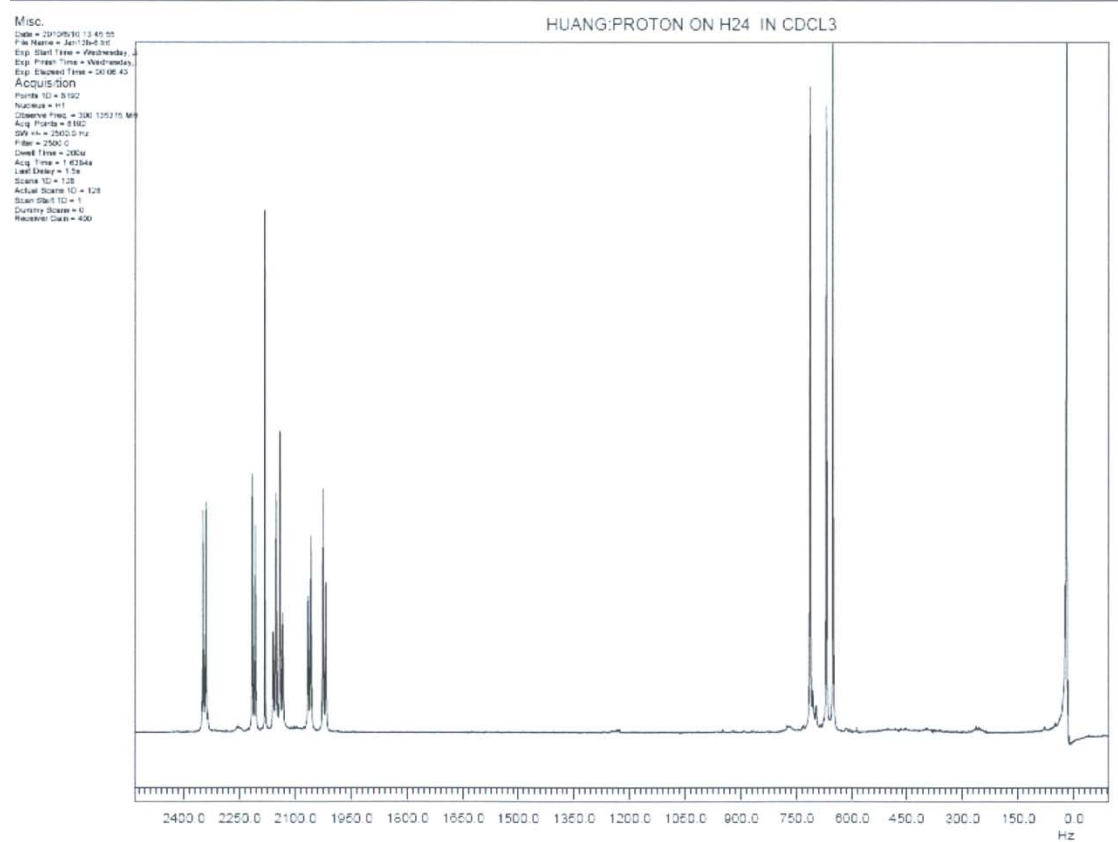

Compound 12

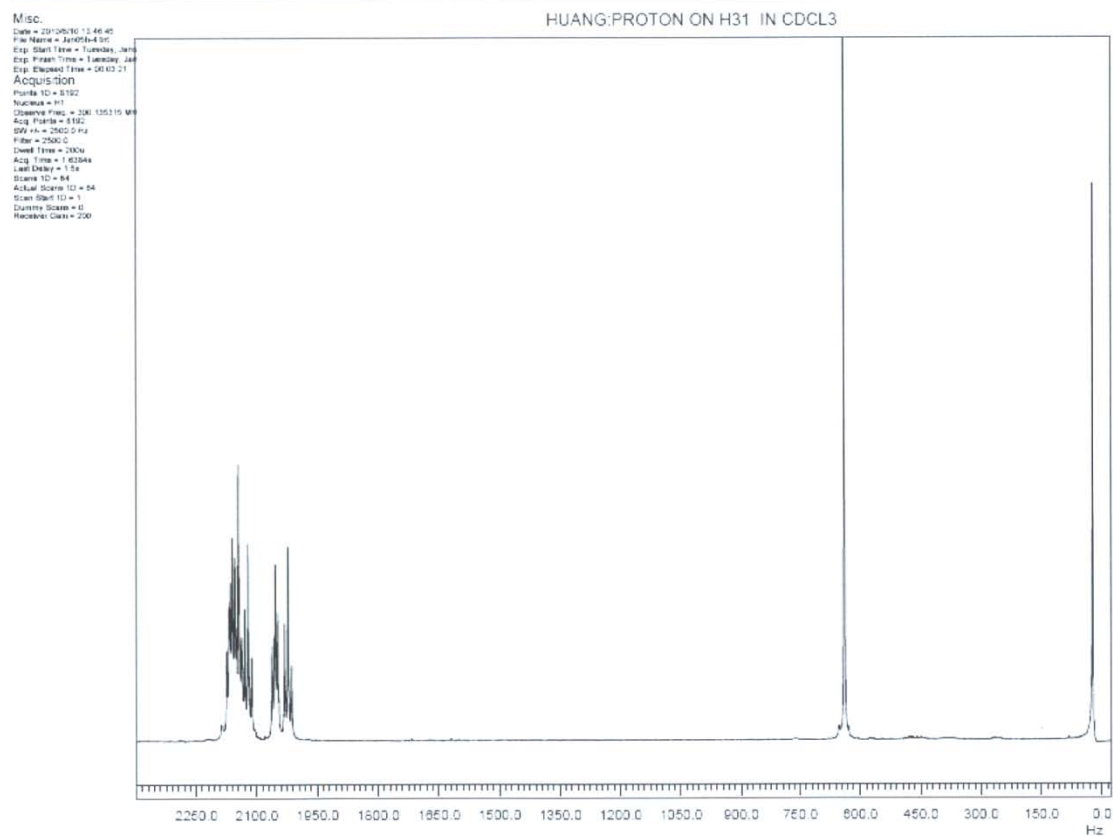

Compound 16

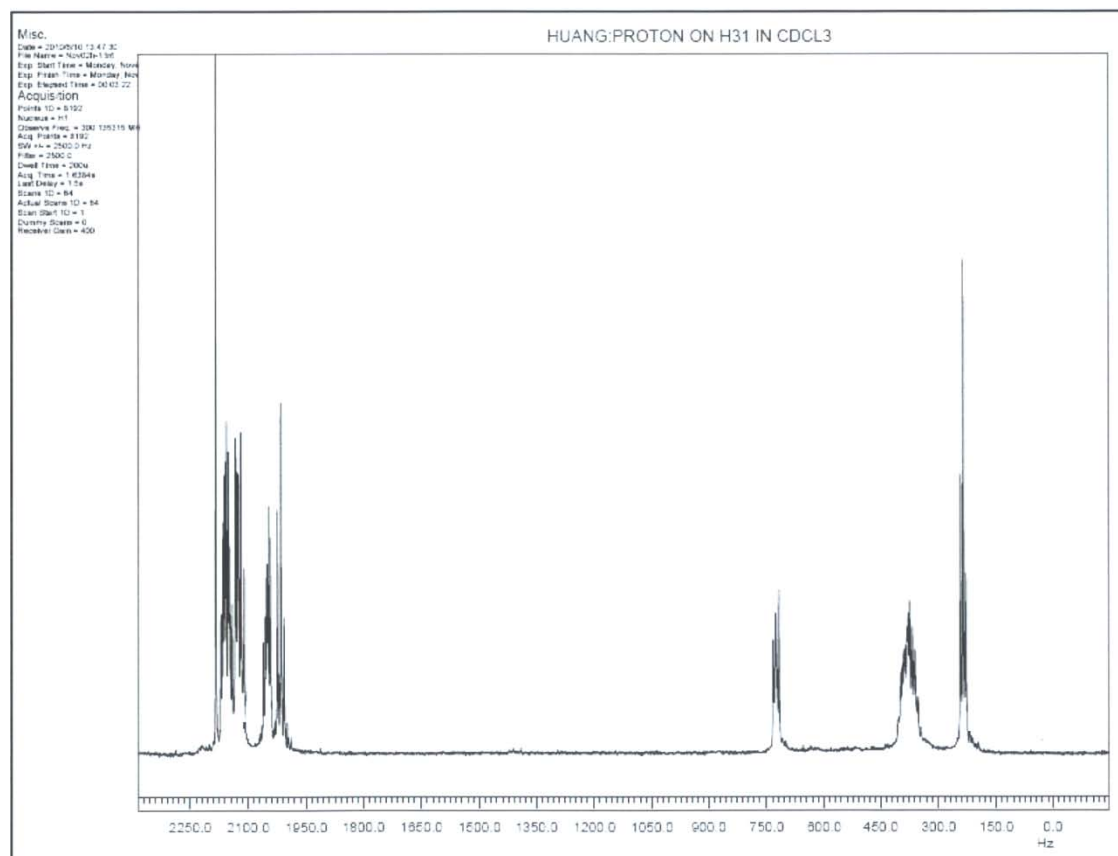

Compound 17

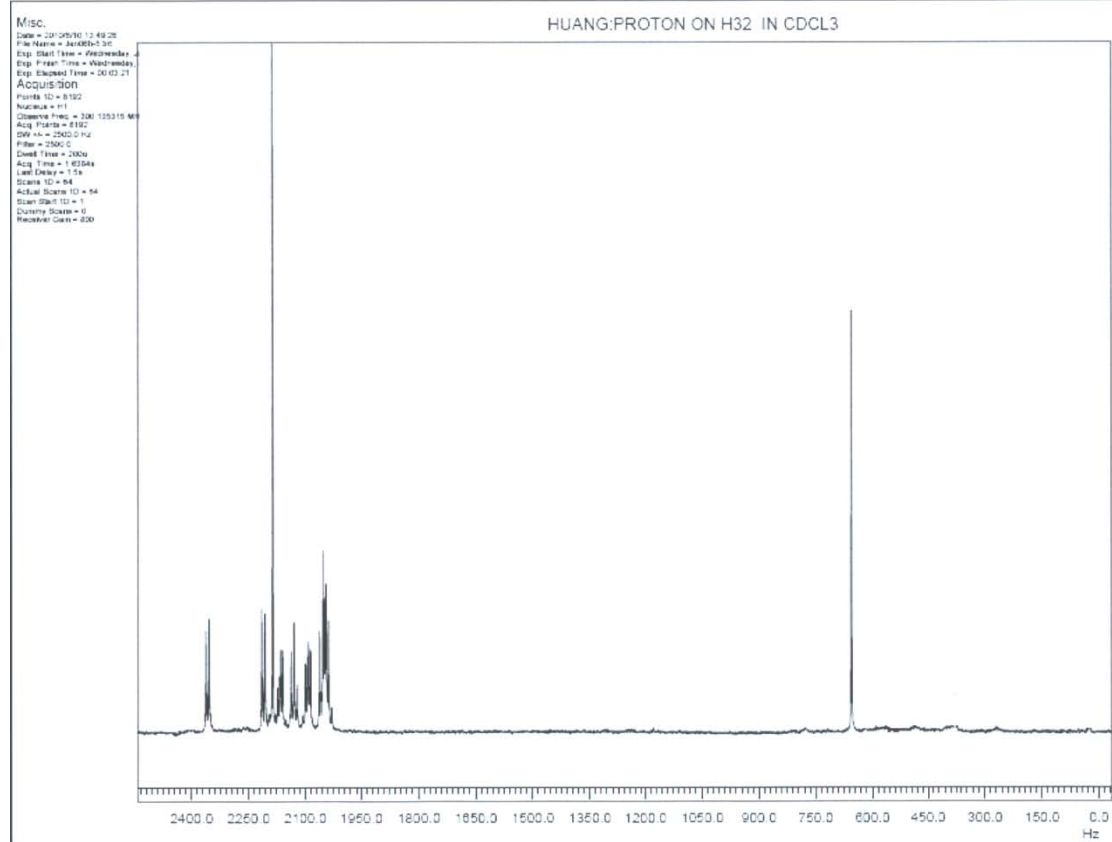

Compound 18



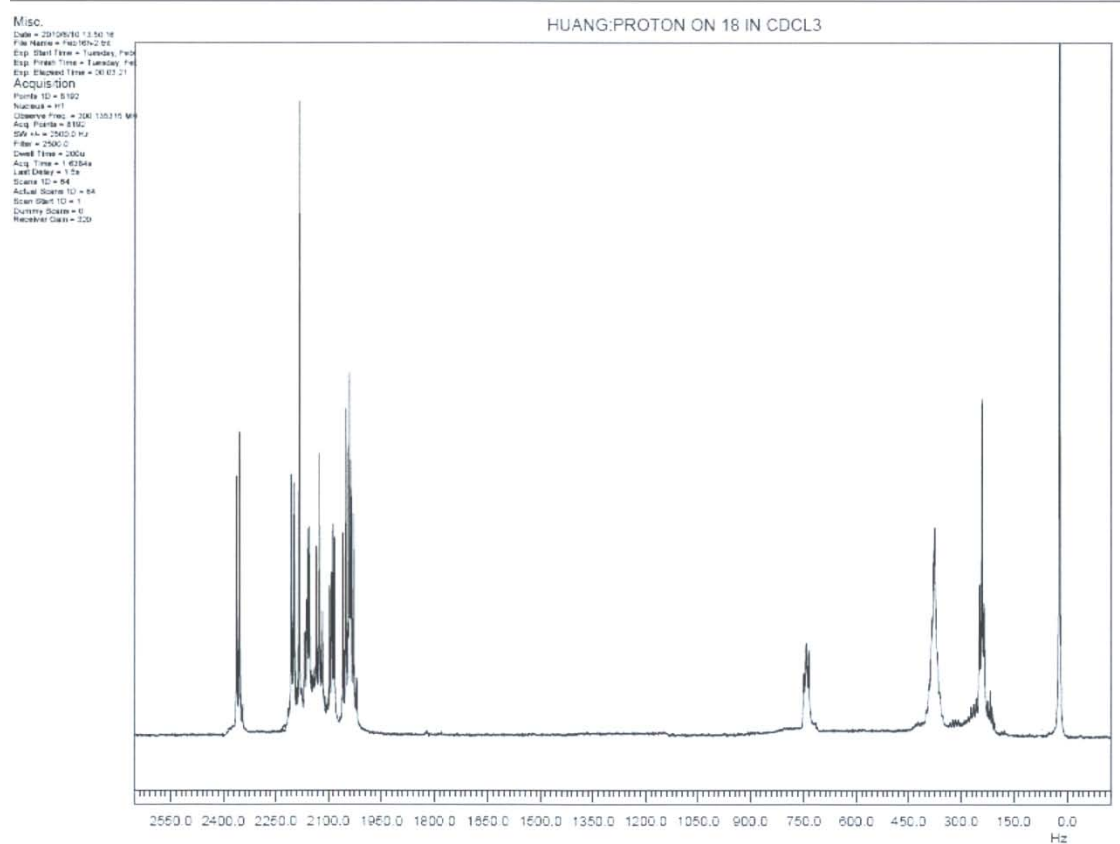

Compound 19

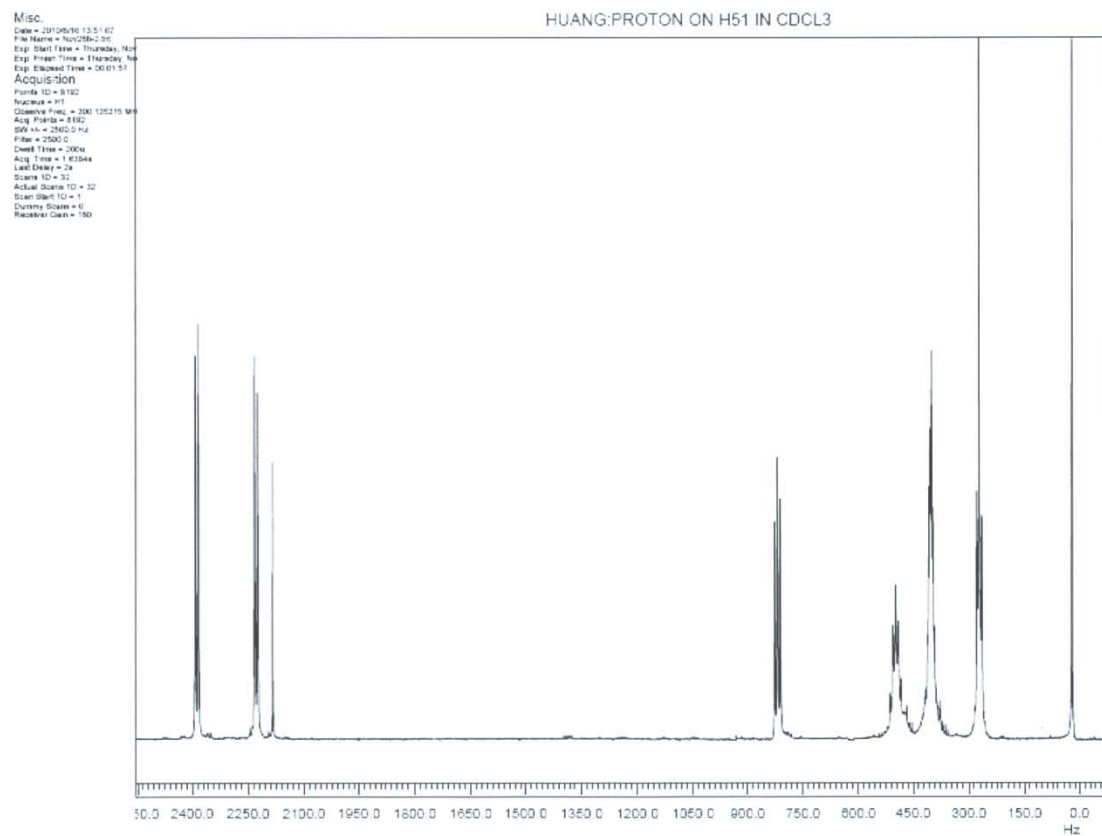

Compound 21

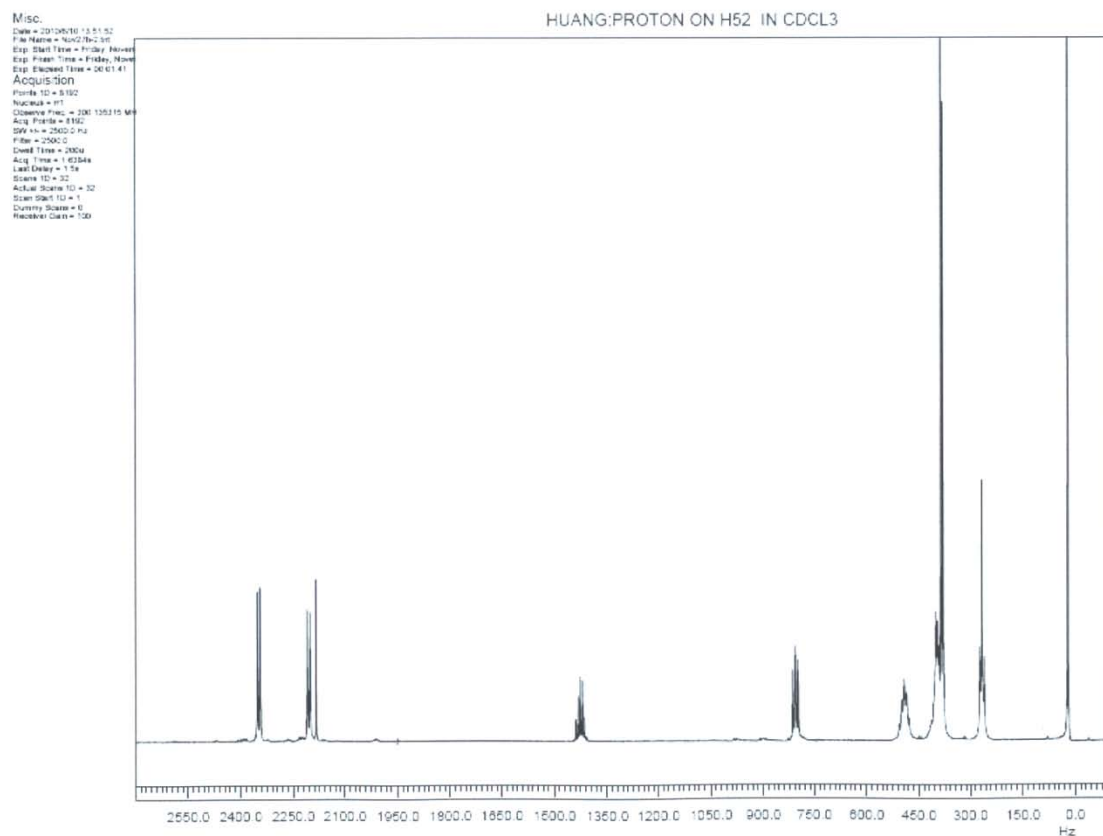

Compound 22

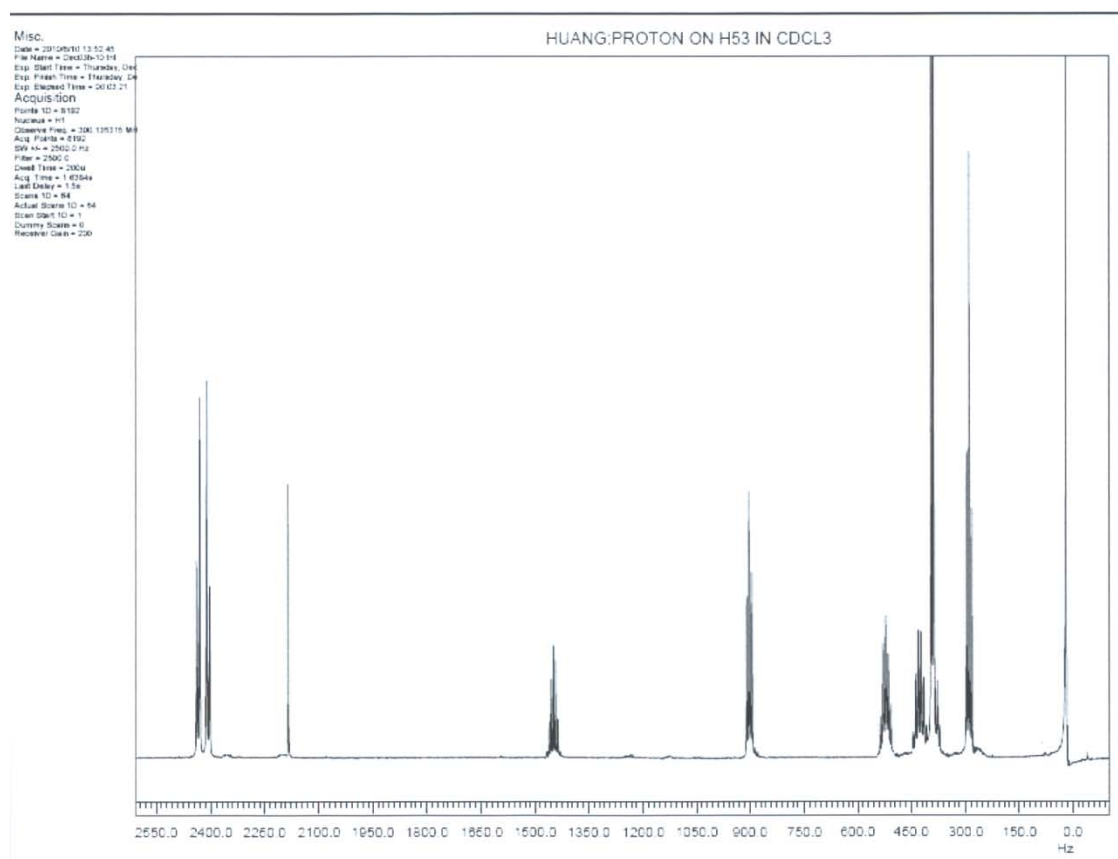

Compound 23

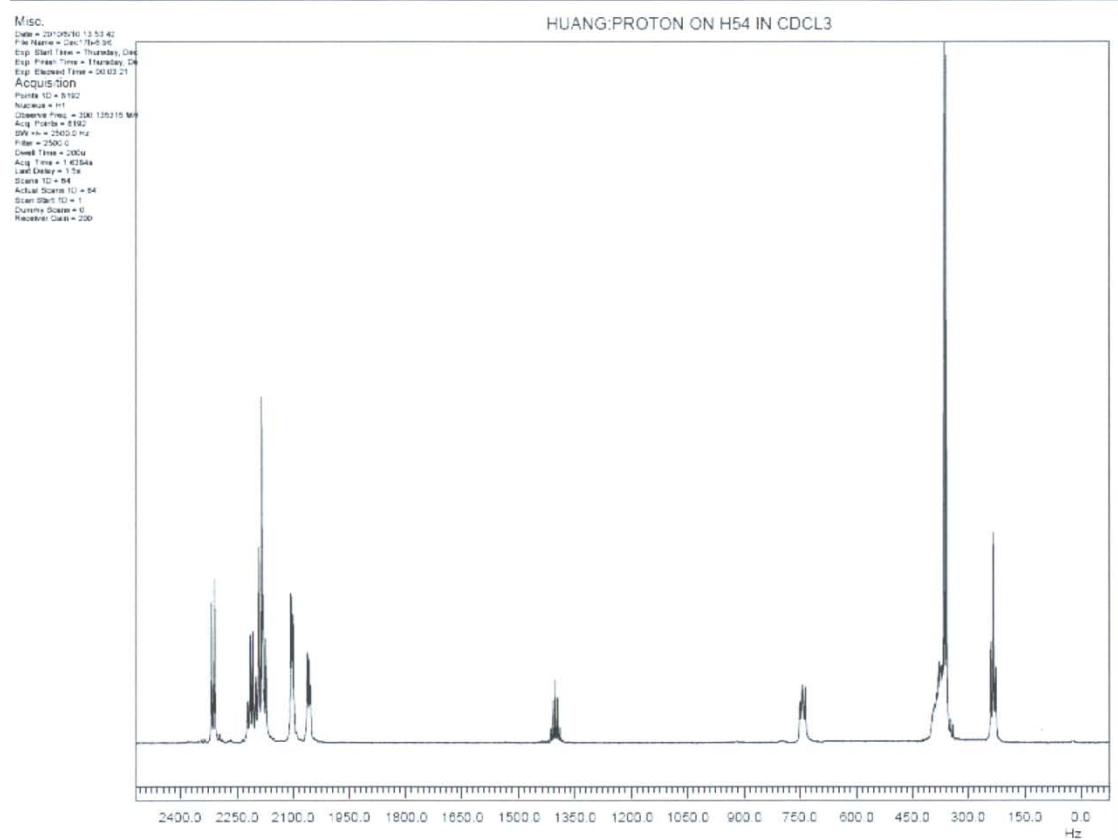

Compound 24

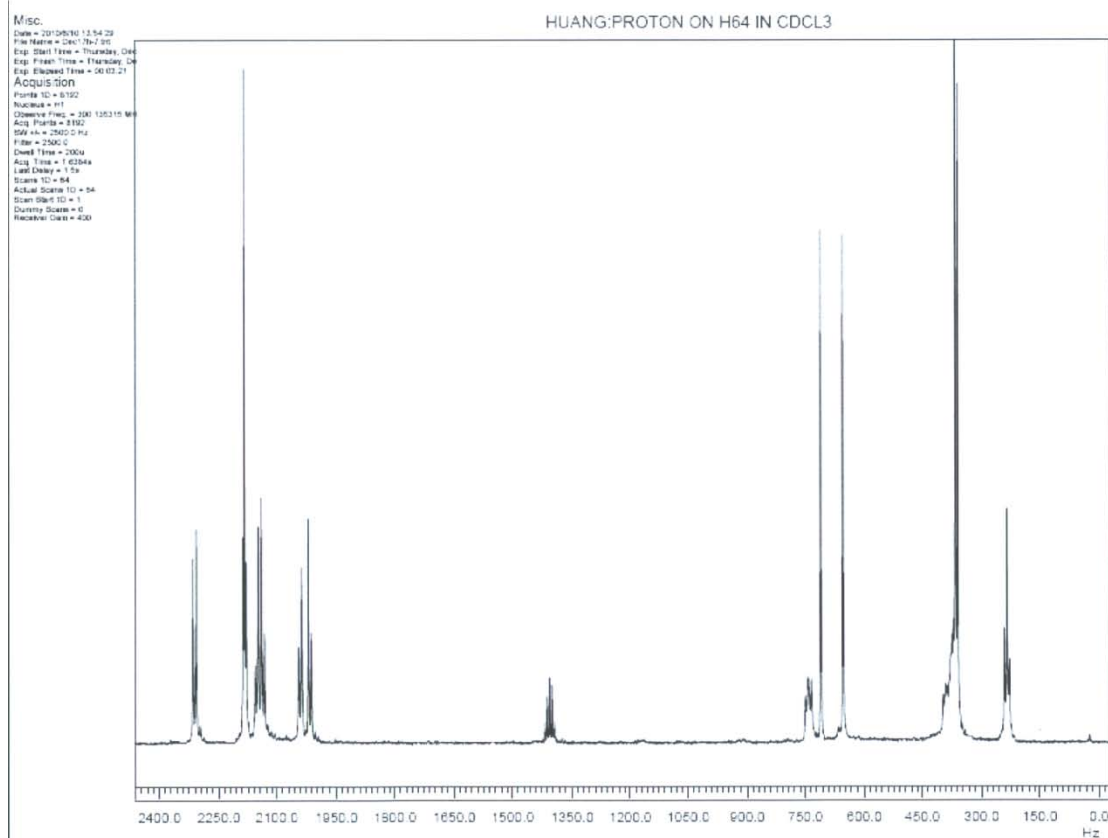

Compound 25

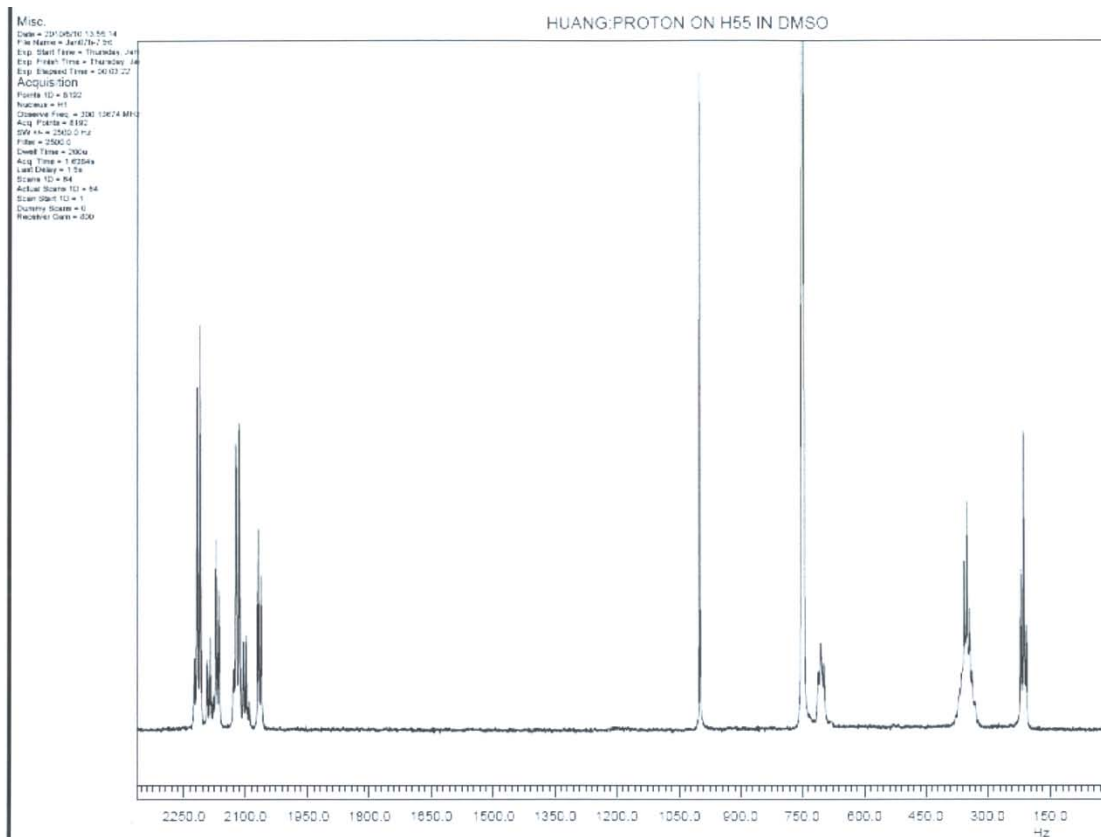

Compound 26

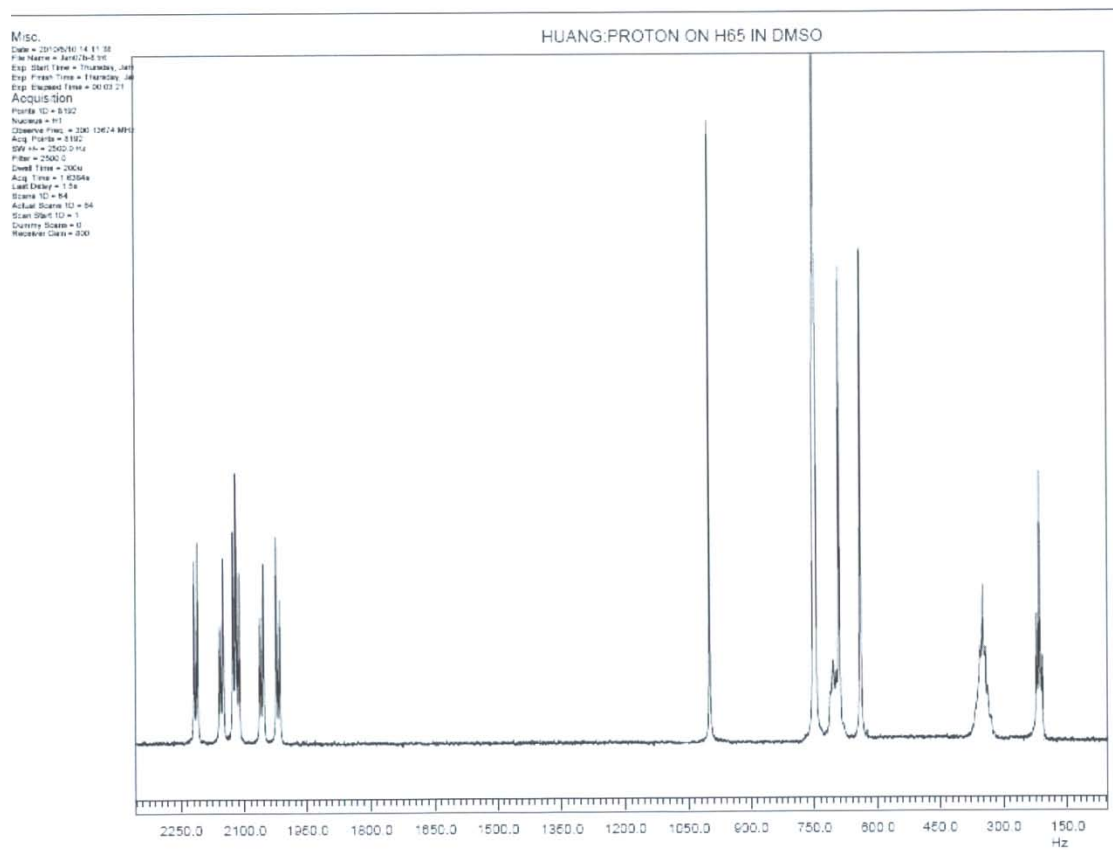

Compound 27



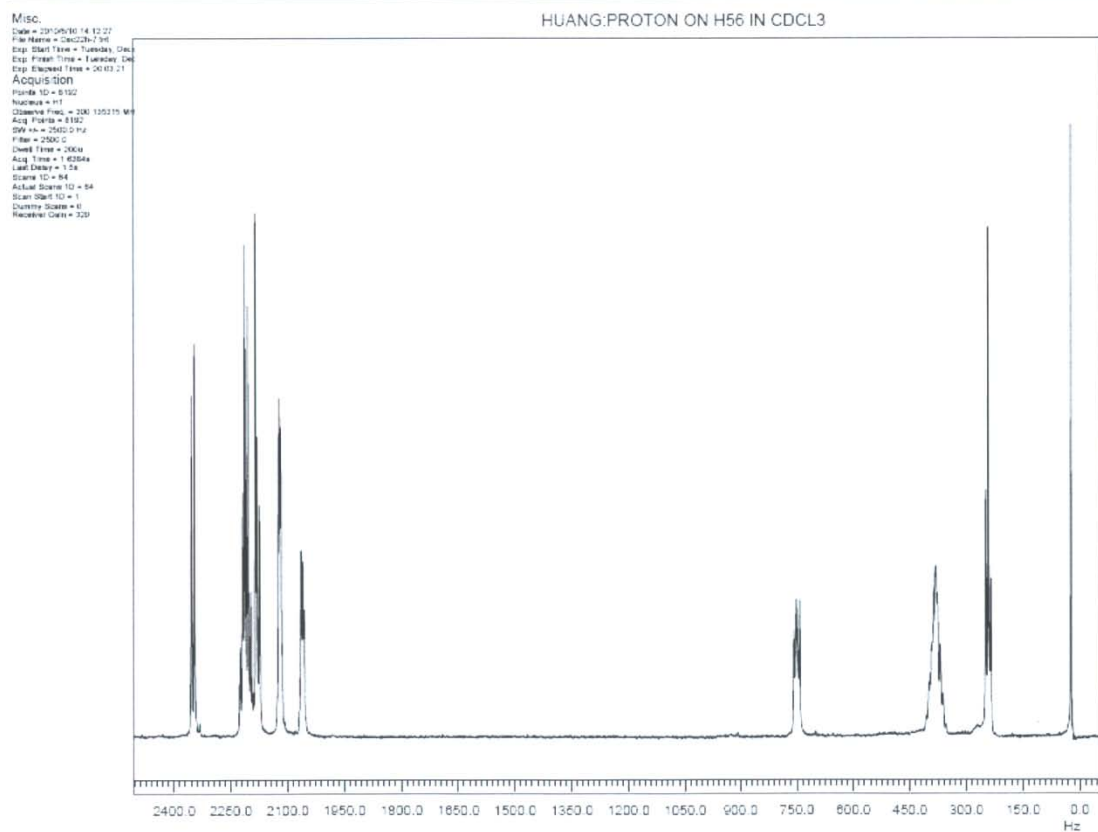

Compound 28

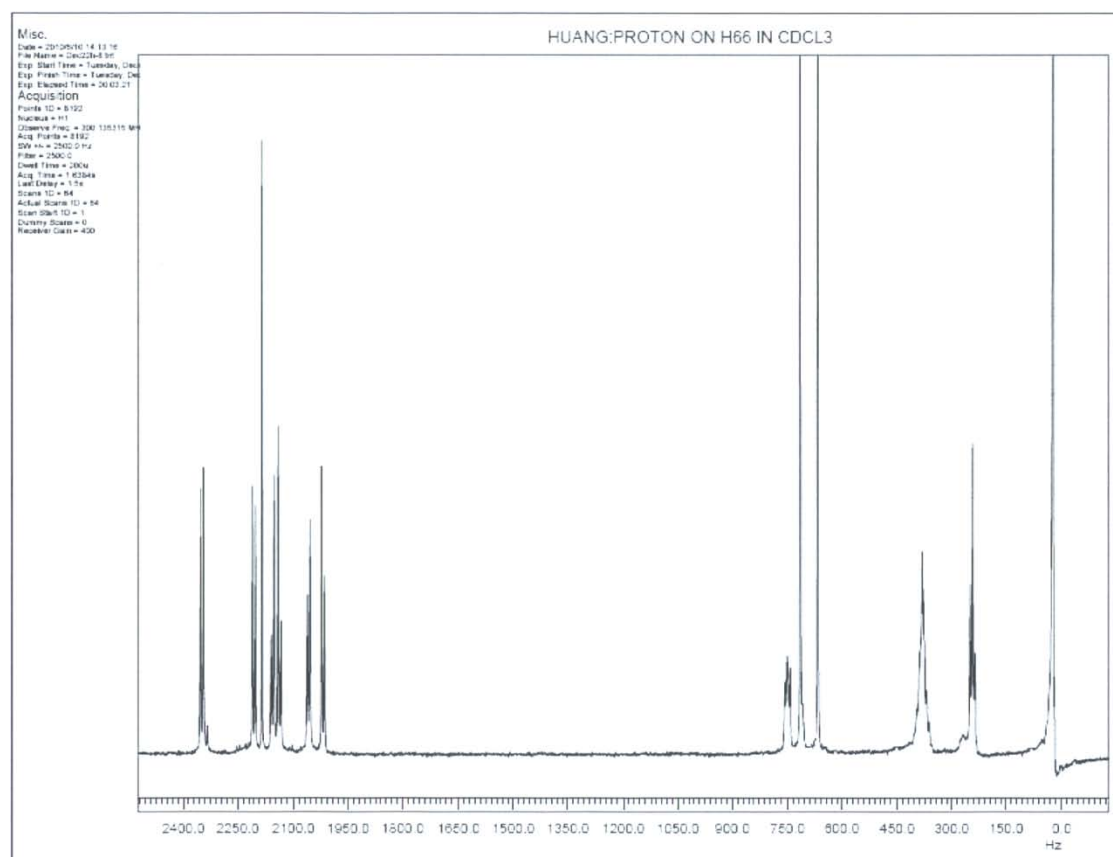

Compound 29

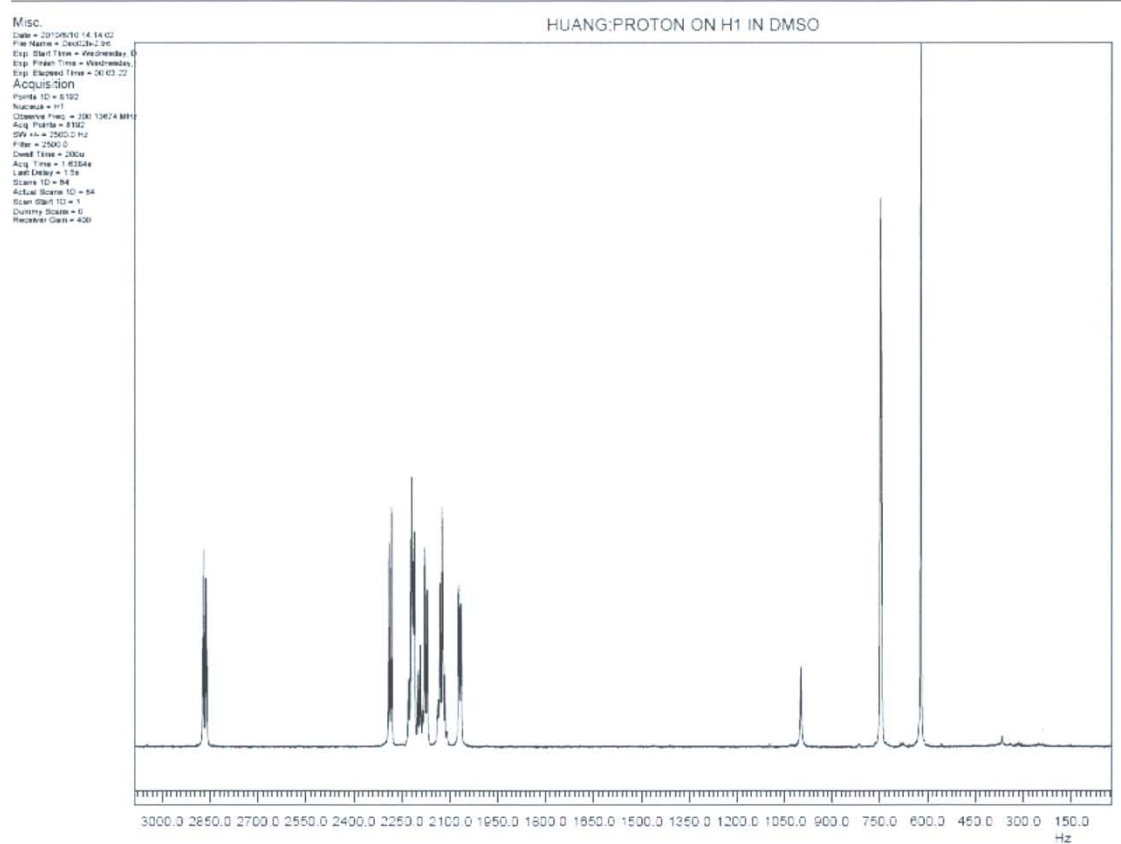

Compound 13a

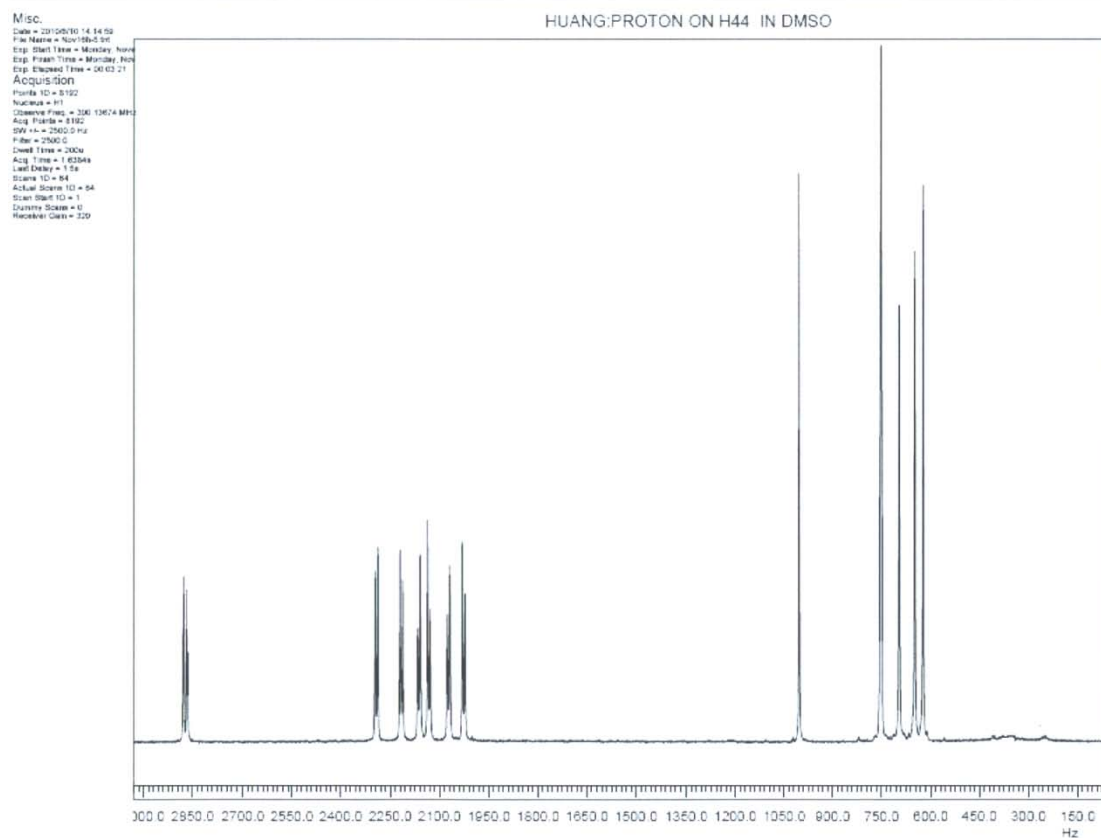

Compound 13b

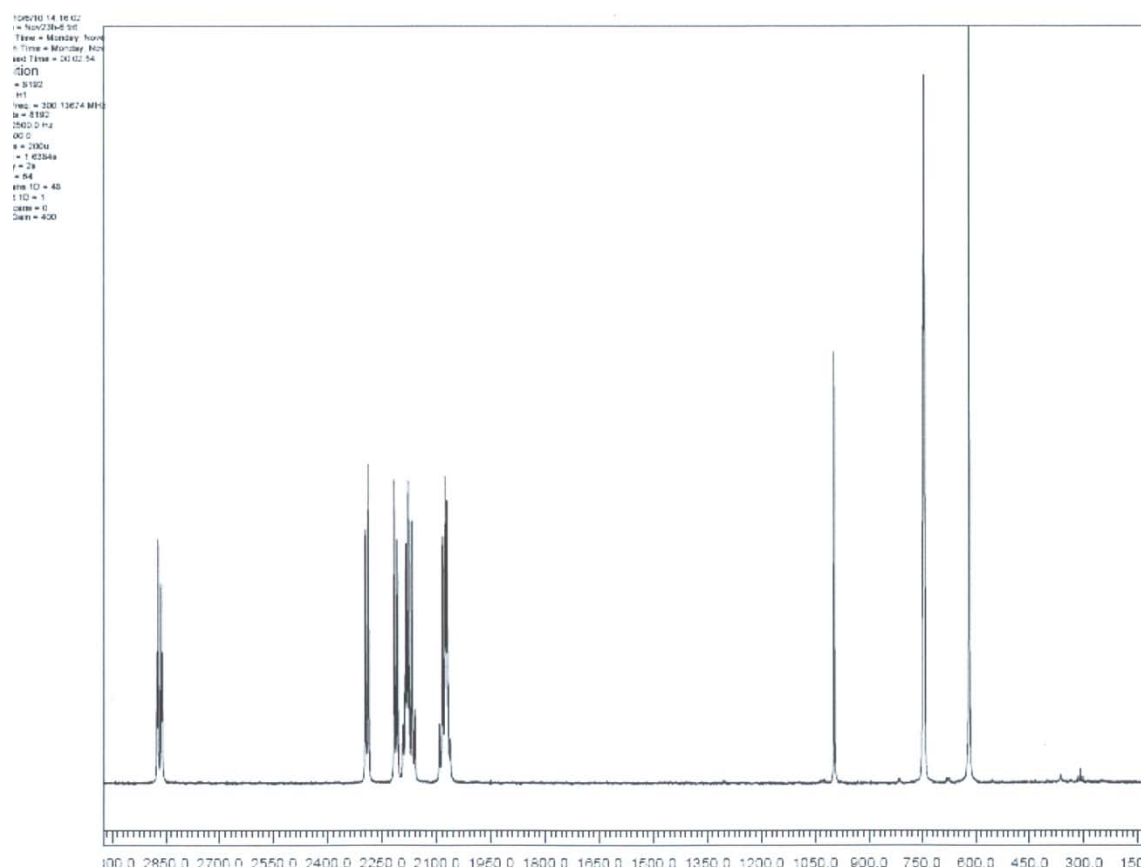

Compound 13c

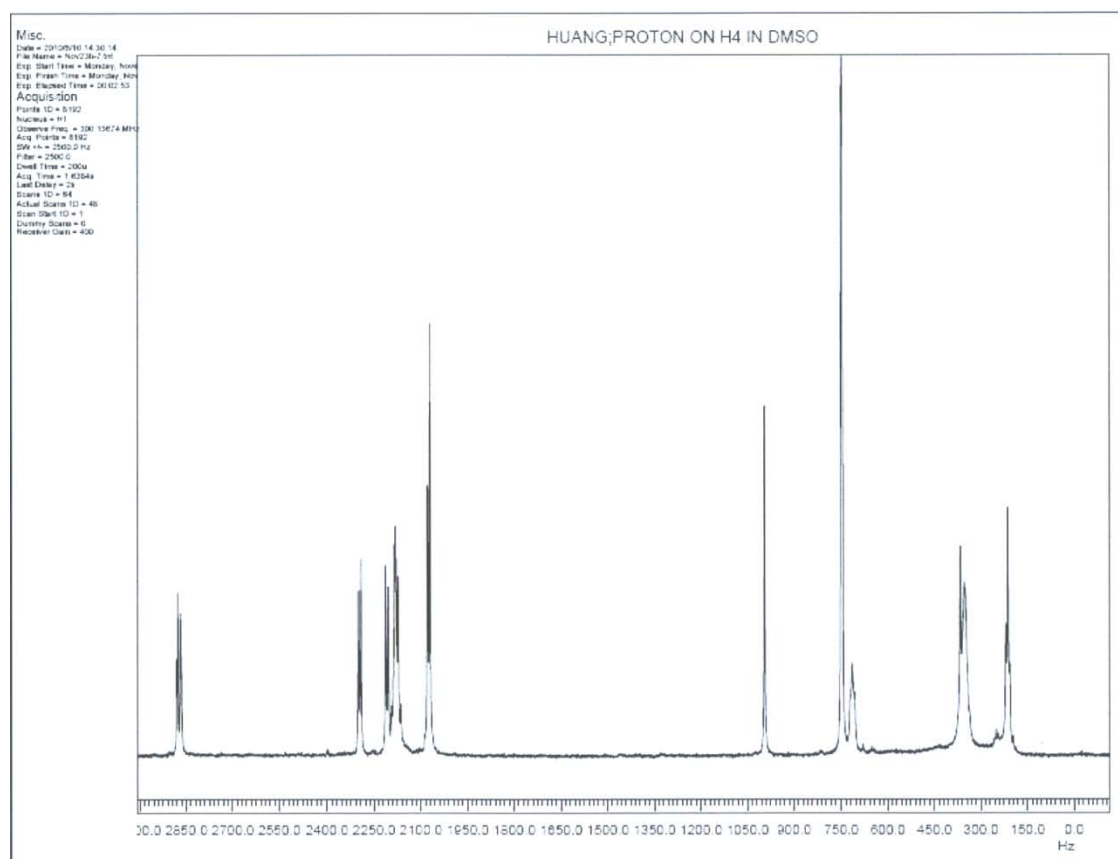

Compound 13d

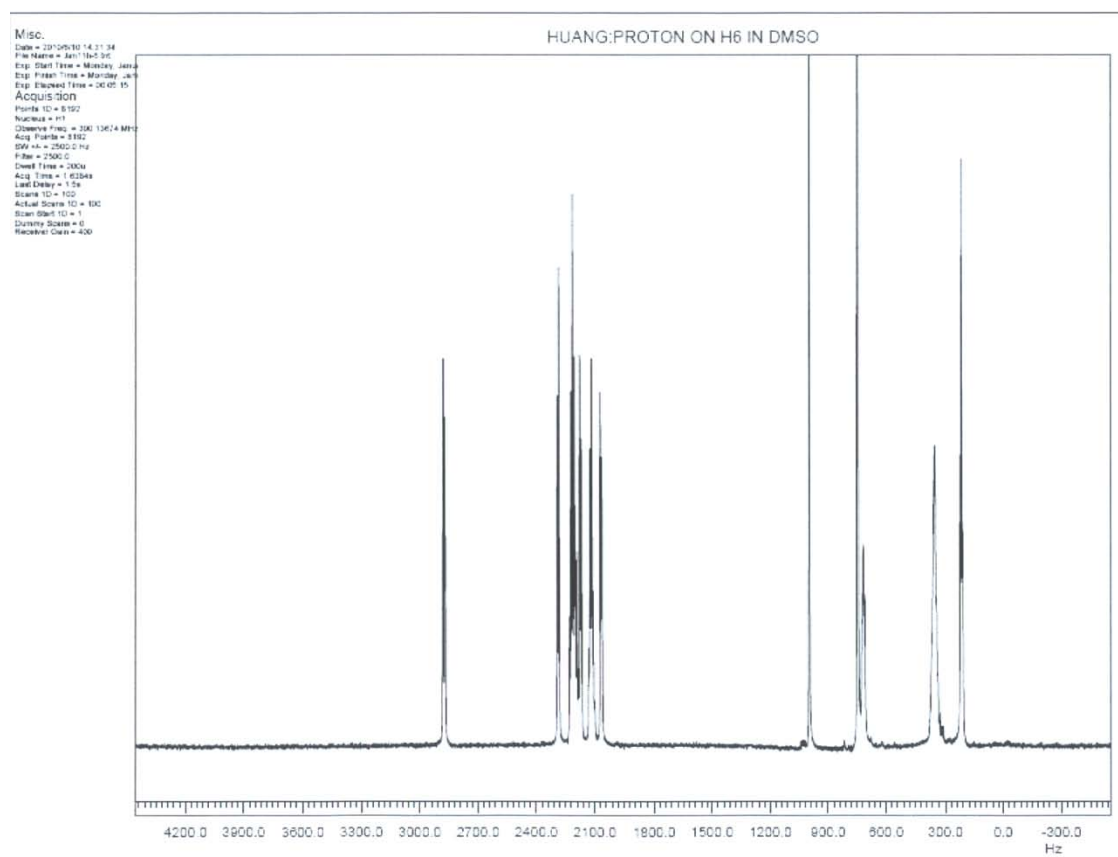

Compound 13e

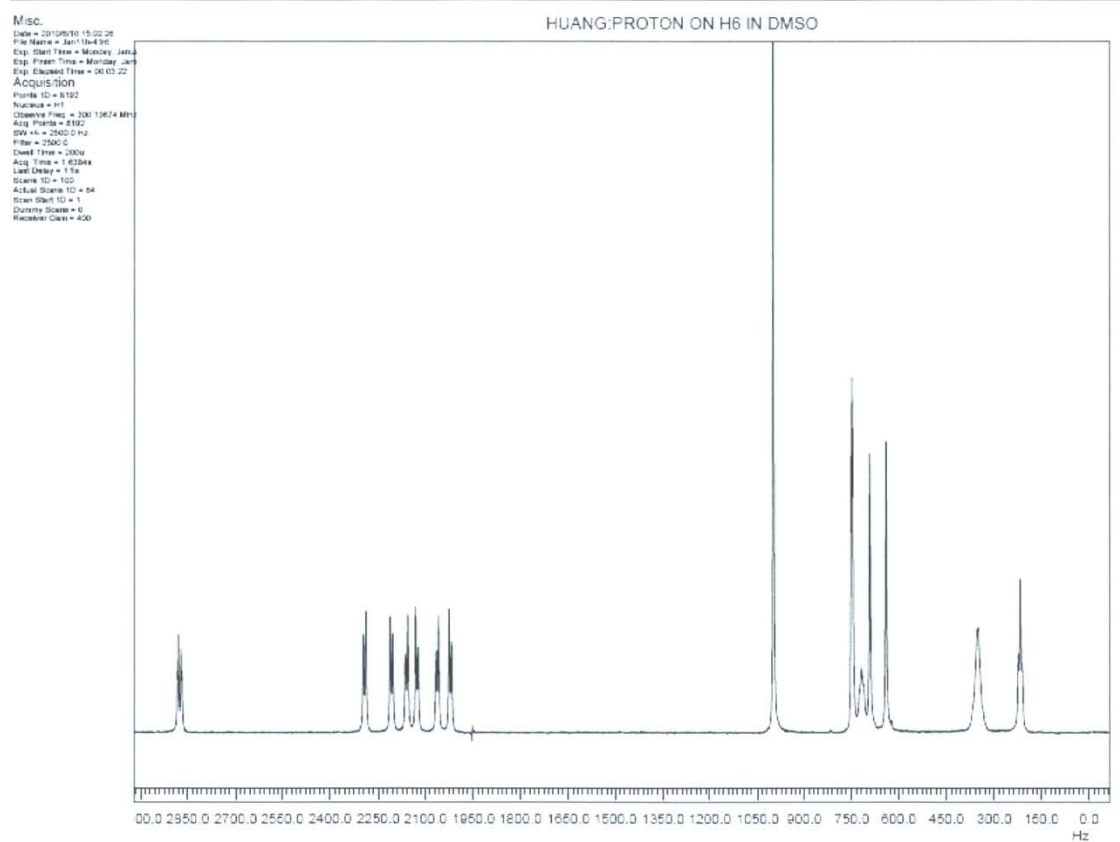

Compound 13f



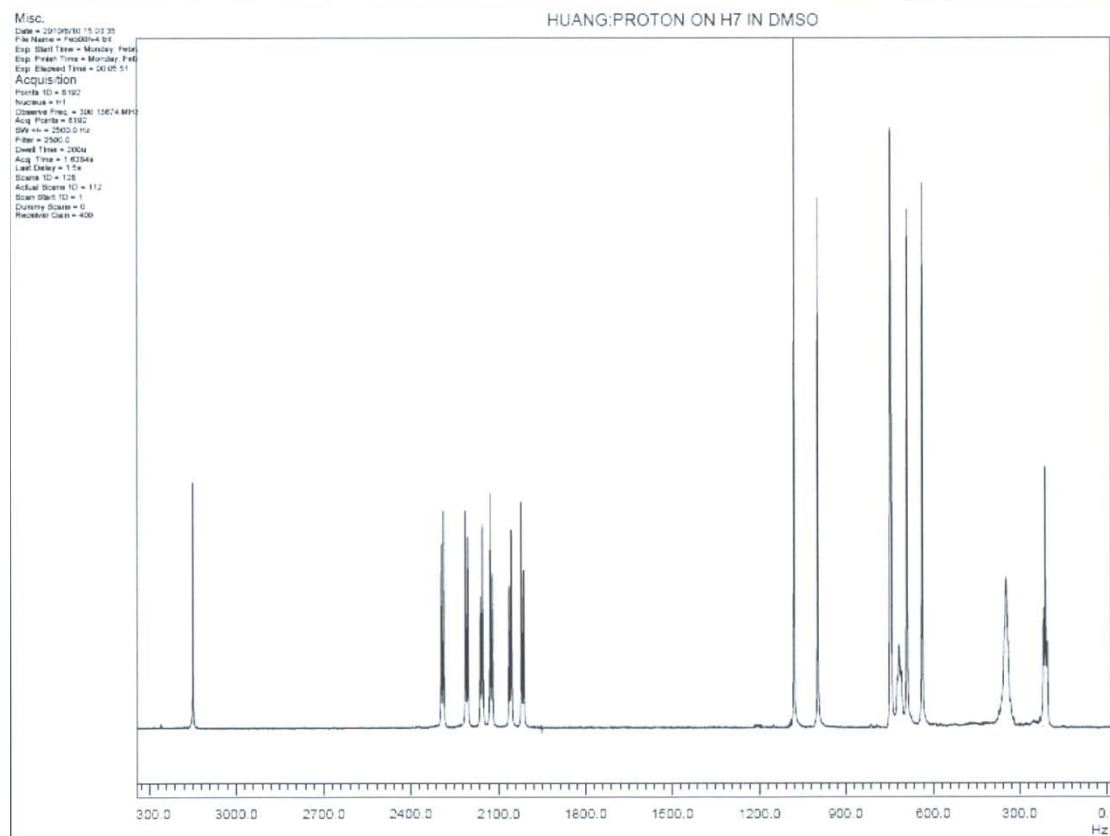

Compound 13g
